# Supplementary material for: Stereoregular polymerization of phenylacetylene using alkynyl and methyl rhodium(i) complexes with functionalized phosphine ligands: linear vs. branched poly(phenylacetylene)s
Source: Royal Society of Chemistry journal article supplement (doi:10.1039/d4py00497c), 2024-01-01
Supplement: d4py00497c1.pdf [file d4py00497c1.pdf]

## Supporting information

# Stereoregular polymerization of phenylacetylene by alkynyl and methyl rhodium(I) complexes with functionalized phosphine ligands: linear vs branched poly(phenylacetylene)s

Marta Angoy <sup>a</sup>, M. Victoria Jiménez <sup>a</sup>, Eugenio Vispe <sup>a</sup>, Stepan Podzimek <sup>b,c,d</sup> and Jesús J. Pérez-Torrente <sup>a</sup>

<sup>a</sup> *Departamento de Química Inorgánica, Instituto de Síntesis Química y Catálisis Homogénea- ISQCH, Universidad de Zaragoza-CSIC, Facultad de Ciencias, C/ Pedro Cerbuna, 12, 50009 Zaragoza, Spain.*

<sup>b</sup> *Institute of Chemistry and Technology of Macromolecular Materials, Faculty of Chemical Technology, University of Pardubice, Pardubice, Czech Republic.*

<sup>c</sup> *Waters | Wyatt Technology, D-56307 Dernbach, Germany.*

<sup>d</sup> *SYNPO, 53207 Pardubice, Czech Republic.*

Email: perez@unizar.es

### Content

|                                                                                  |     |
|----------------------------------------------------------------------------------|-----|
| 1.- NMR spectra of alkynyl and methyl rhodium complexes                          | S2  |
| 2.- ESI-MS of alkynyl and methyl rhodium complexes                               | S16 |
| 3.- Polyphenylacetylene characterization.                                        | S22 |
| 4.- SEC-MALS and A4F-MALS chromatograms and conformational plots of PPA samples. | S24 |
| 5.- Possible branching mechanism.                                                | S29 |
| 6.- References                                                                   | S31 |

**1.- NMR spectra of alkynyl and methyl rhodium complexes having N- and O-functionalized phosphino ligands.**

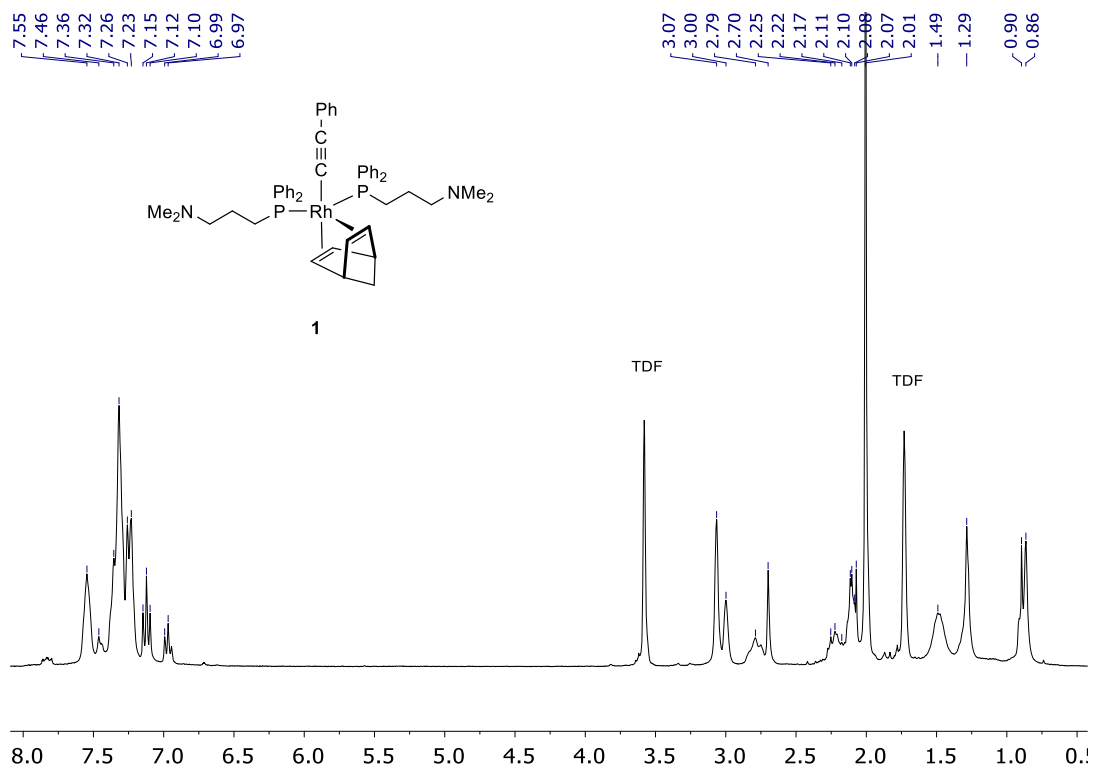

**Figure S1.**  $^1\text{H}$  NMR (300 MHz,  $\text{THF}-d_8$ , 253 K) of  $[\text{Rh}(\text{C}\equiv\text{C}-\text{Ph})(\text{nbd})\{\text{Ph}_2\text{P}(\text{CH}_2)_3\text{NMe}_2\}_2]$  (**1**).

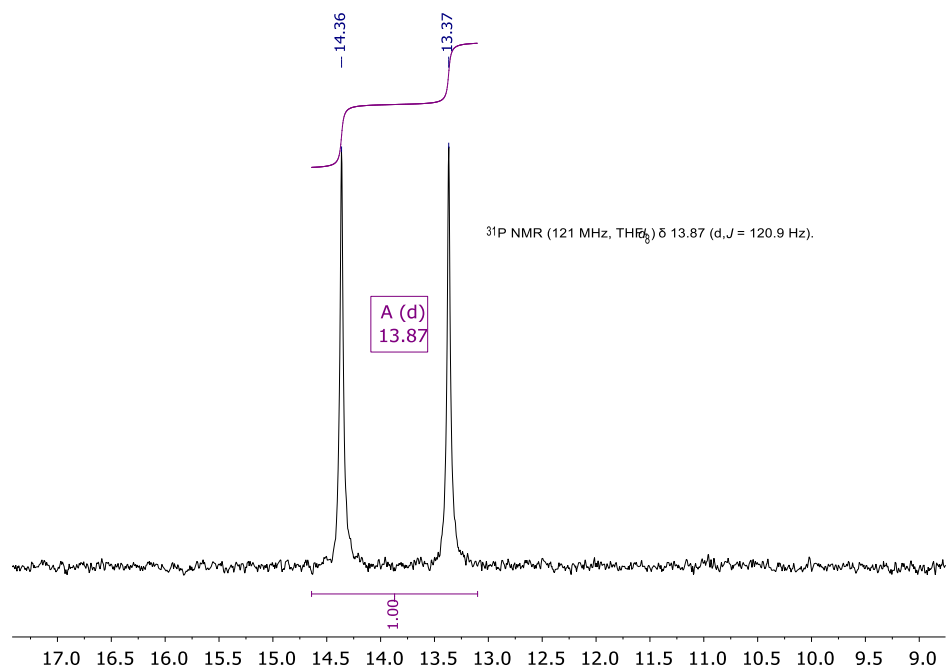

**Figure S2.**  $^{31}\text{P}\{^1\text{H}\}$  NMR (121 MHz,  $\text{THF}-d_8$ , 253 K) of  $[\text{Rh}(\text{C}\equiv\text{C}-\text{Ph})(\text{nbd})\{\text{Ph}_2\text{P}(\text{CH}_2)_3\text{NMe}_2\}_2]$  (**1**).

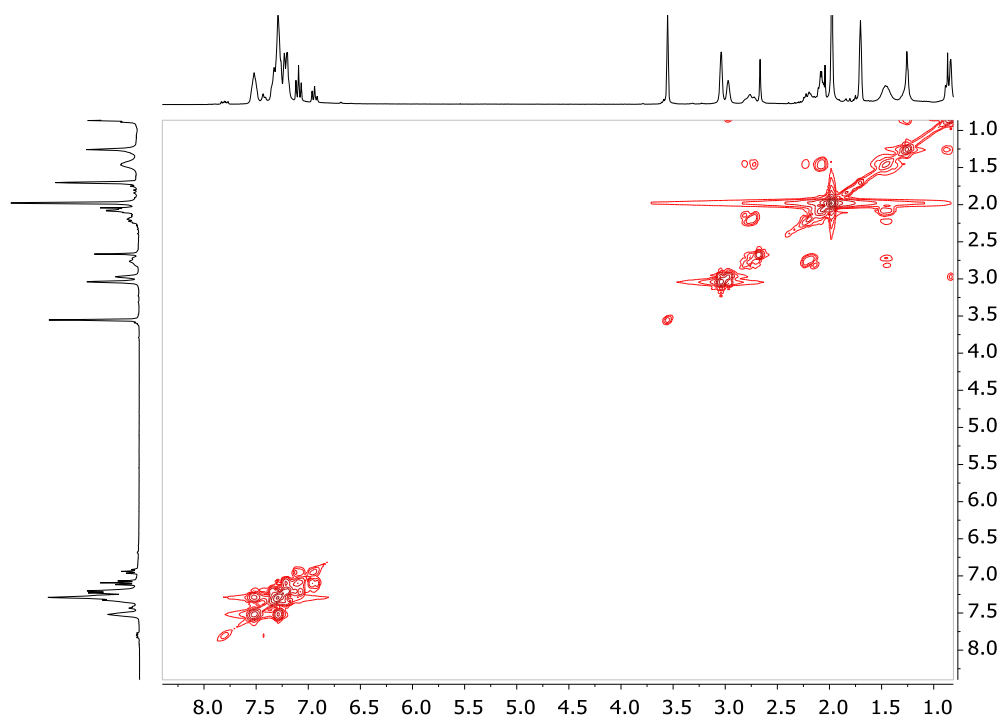

**Figure S3.**  $^1\text{H}/^1\text{H}$ -COSY NMR (THF- $d_8$ , 253 K) of  $[\text{Rh}(\text{C}\equiv\text{C}-\text{Ph})(\text{nbd})\{\text{Ph}_2\text{P}(\text{CH}_2)_3\text{NMe}_2\}_2]$  (**1**).

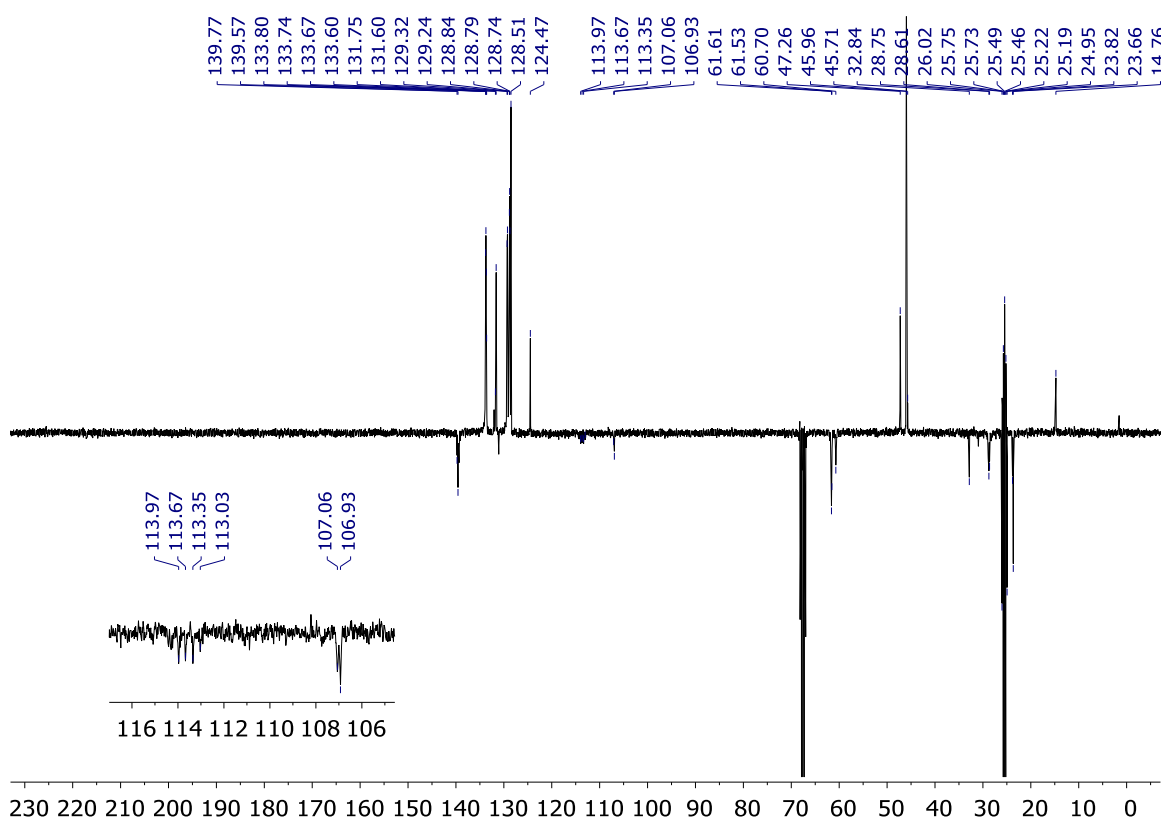

**Figure S4.**  $^{13}\text{C}\{^1\text{H}\}$  NMR (75 MHz, THF- $d_8$ , 253 K) of  $[\text{Rh}(\text{C}\equiv\text{C}-\text{Ph})(\text{nbd})\{\text{Ph}_2\text{P}(\text{CH}_2)_3\text{NMe}_2\}_2]$  (**1**).

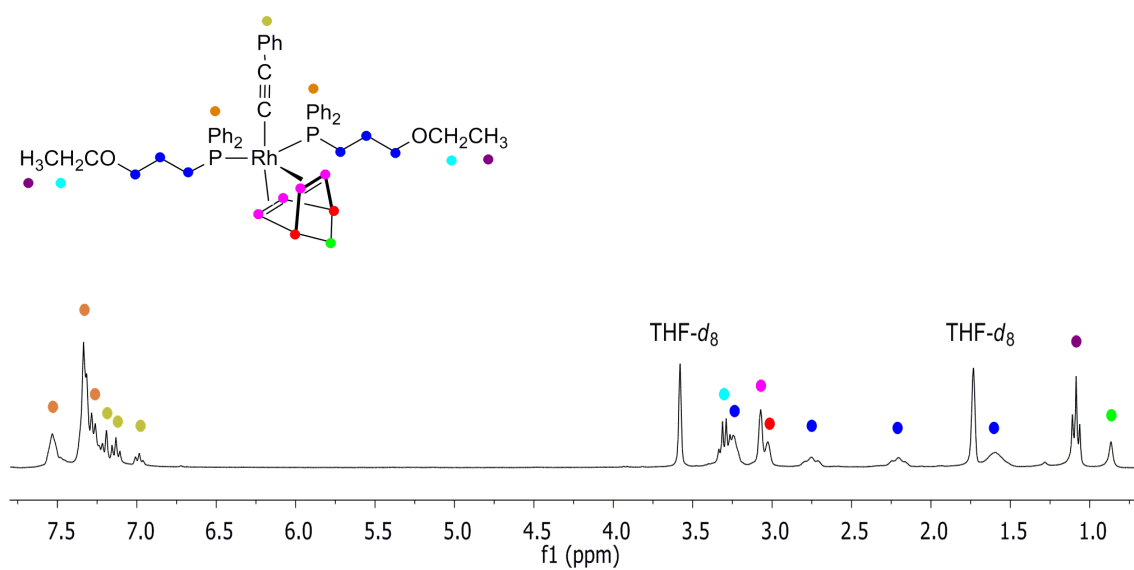

**Figure S5.**  $^1\text{H}$  NMR (300 MHz,  $\text{THF}-d_8$ , 253 K) of  $[\text{Rh}(\text{C}\equiv\text{C}-\text{Ph})(\text{nbd})\{\text{Ph}_2\text{P}(\text{CH}_2)_3\text{OEt}\}_2]$  (2).

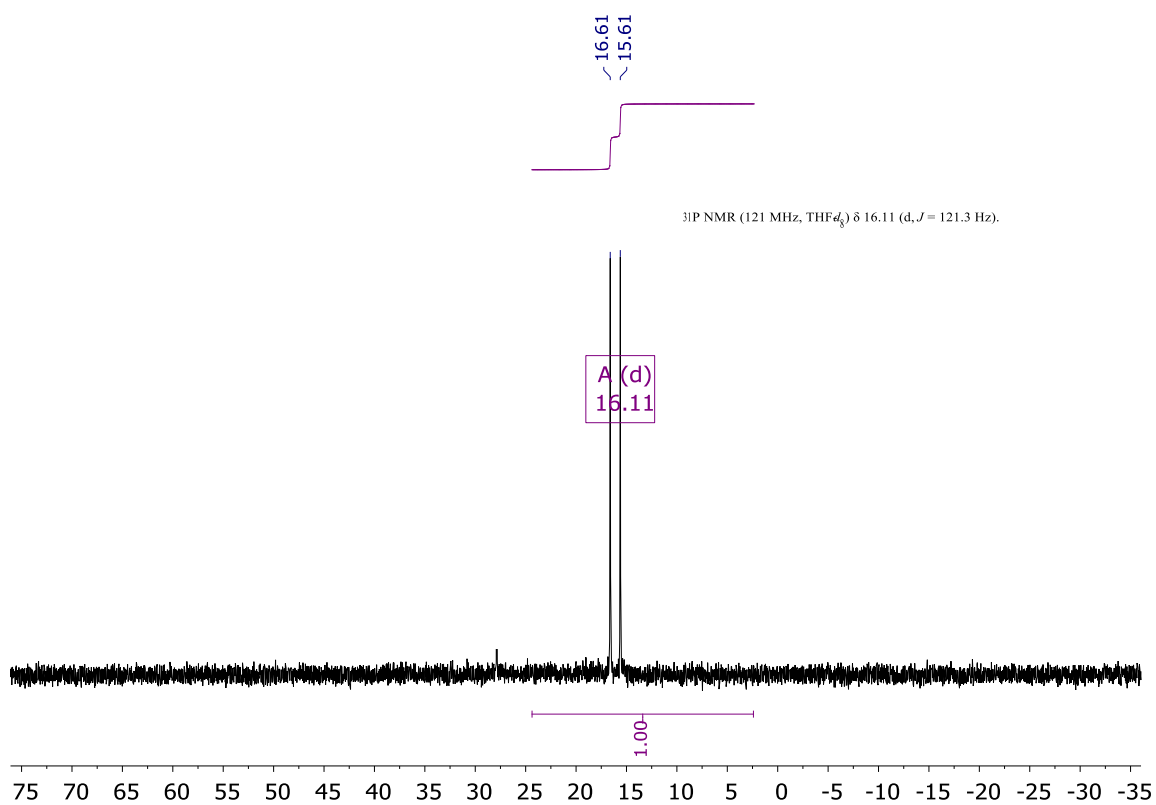

**Figure S6.**  $^{31}\text{P}\{^1\text{H}\}$  NMR (300 MHz,  $\text{THF}-d_8$ , 253 K) of  $[\text{Rh}(\text{C}\equiv\text{C}-\text{Ph})(\text{nbd})\{\text{Ph}_2\text{P}(\text{CH}_2)_3\text{OEt}\}_2]$  (2).

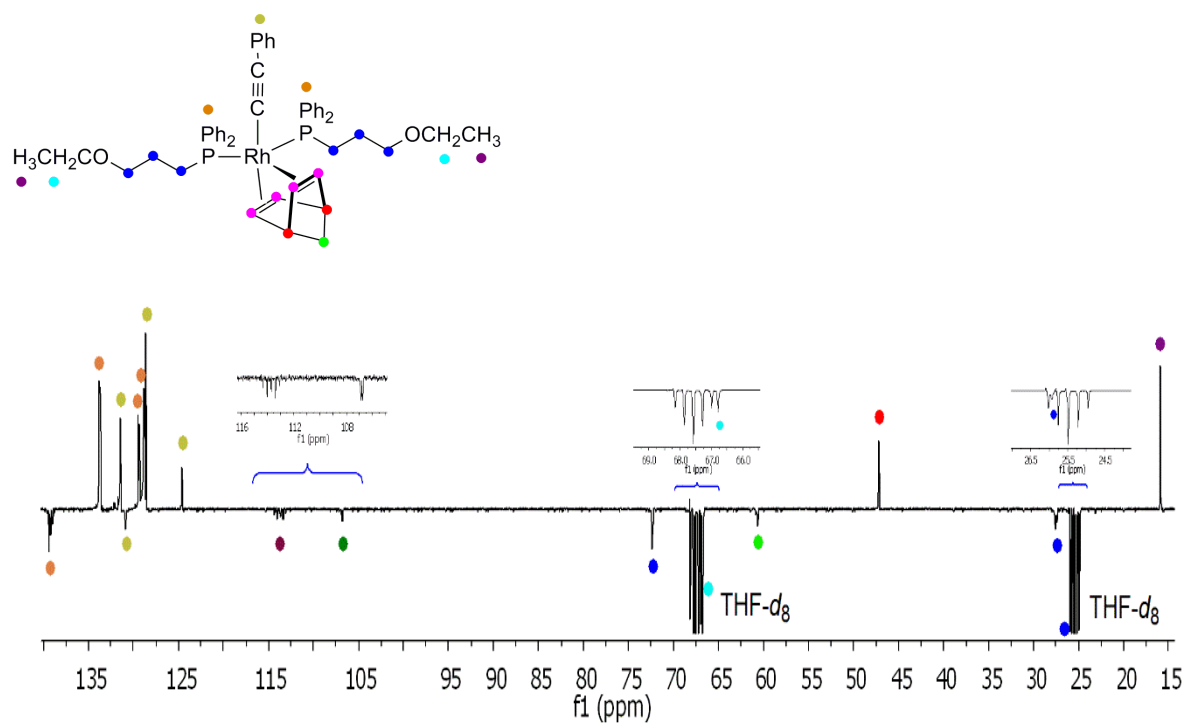

**Figure S7.**  $^{13}\text{C}\{^1\text{H}\}$  NMR (75 MHz,  $\text{THF-}d_8$ , 253 K) of  $[\text{Rh}(\text{C}\equiv\text{C-Ph})(\text{nbd})\{\text{Ph}_2\text{P}(\text{CH}_2)_3\text{OEt}\}_2]$  (**2**).

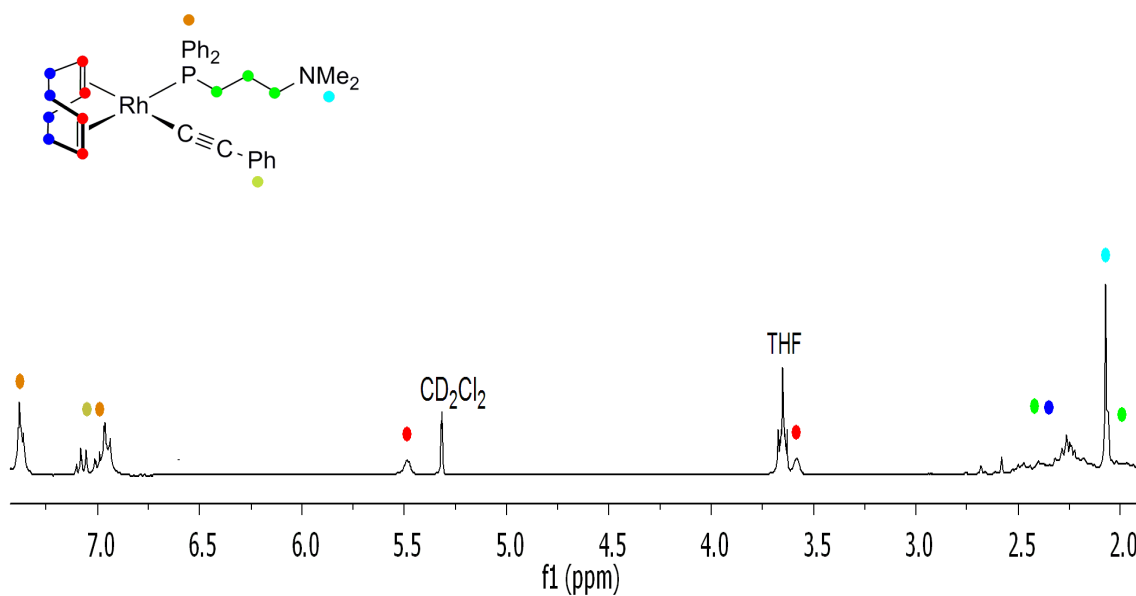

**Figure S8.**  $^1\text{H}$  NMR (300 MHz,  $\text{CD}_2\text{Cl}_2$ , 233 K) of  $[\text{Rh}(\text{C}\equiv\text{C-Ph})(\text{cod})\{\text{Ph}_2\text{P}(\text{CH}_2)_3\text{NMe}_2\}]$  (**3**).

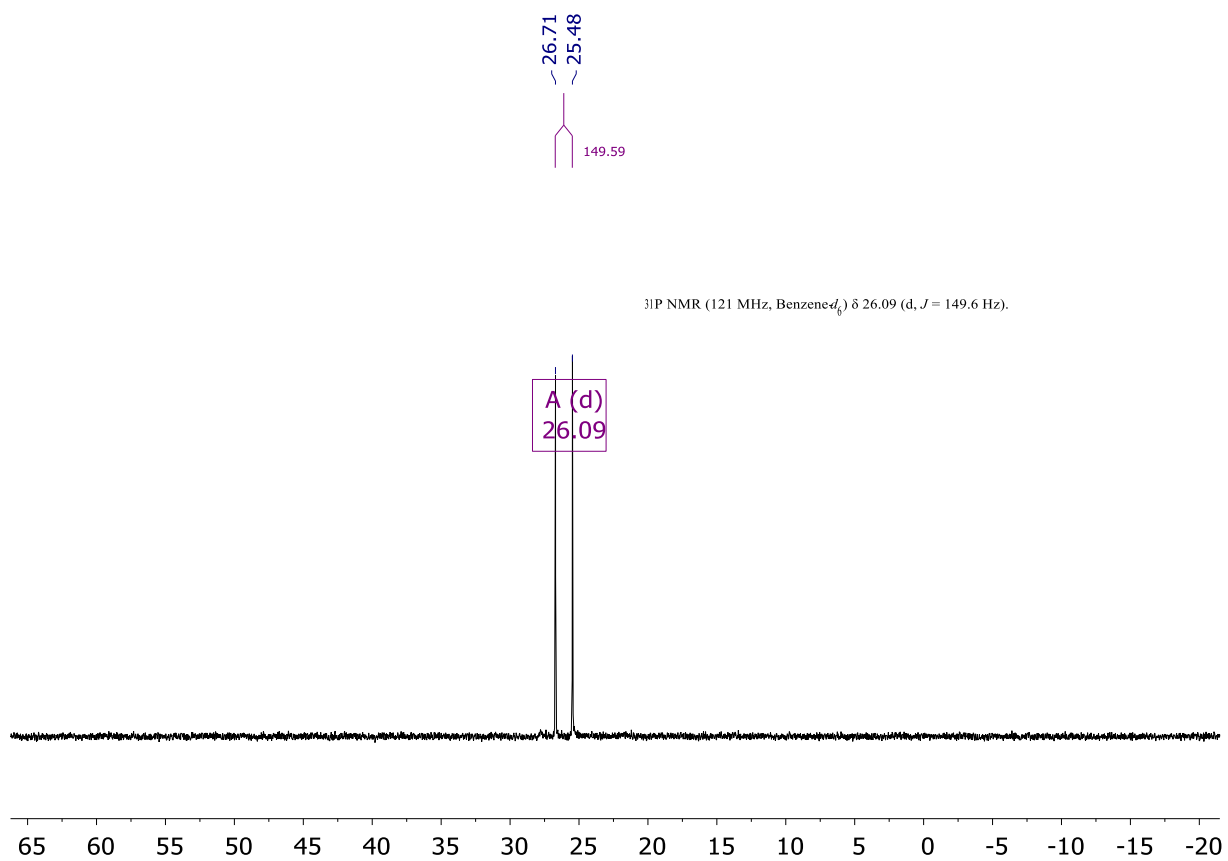

**Figure S9.**  $^{31}\text{P}$  NMR (300 MHz,  $\text{C}_6\text{D}_6$ , 298 K) of  $[\text{Rh}(\text{C}\equiv\text{C}-\text{Ph})(\text{cod})\{\text{Ph}_2\text{P}(\text{CH}_2)_3\text{NMe}_2\}]$  (**3**).

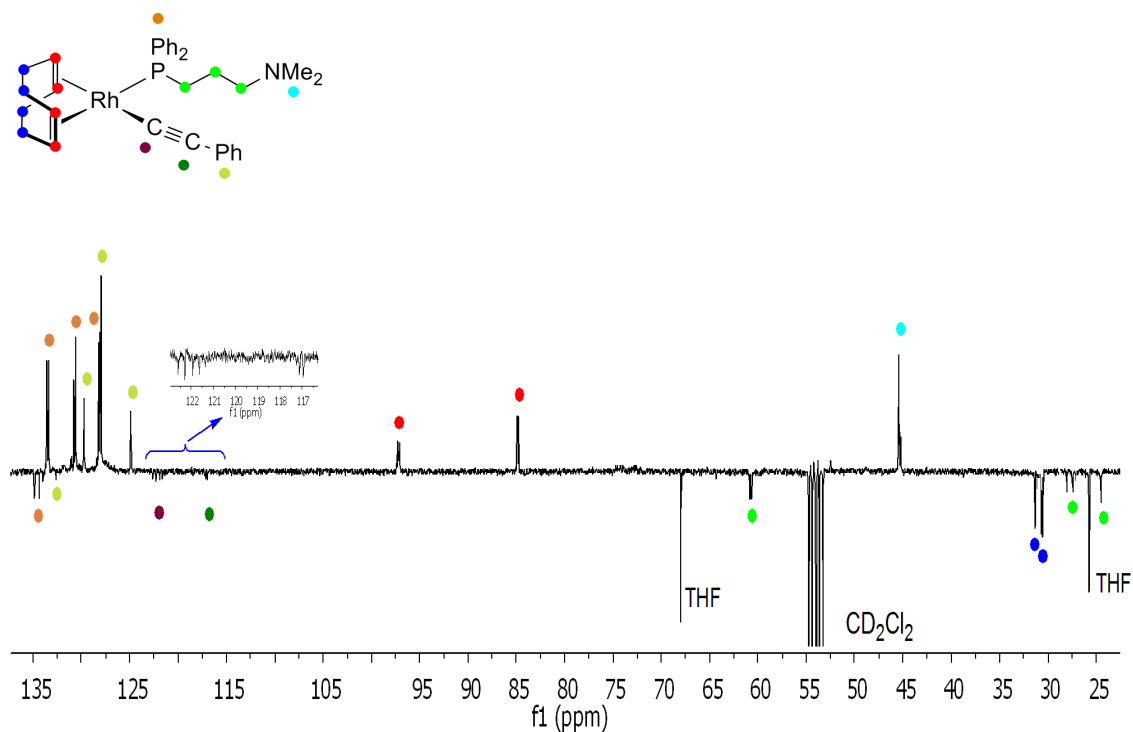

**Figure S10.**  $^{13}\text{C}\{^1\text{H}\}$  NMR (75 MHz,  $\text{CD}_2\text{Cl}_2$ , 233 K) of  $[\text{Rh}(\text{C}\equiv\text{C}-\text{Ph})(\text{cod})\{\text{Ph}_2\text{P}(\text{CH}_2)_3\text{NMe}_2\}]$  (**3**).

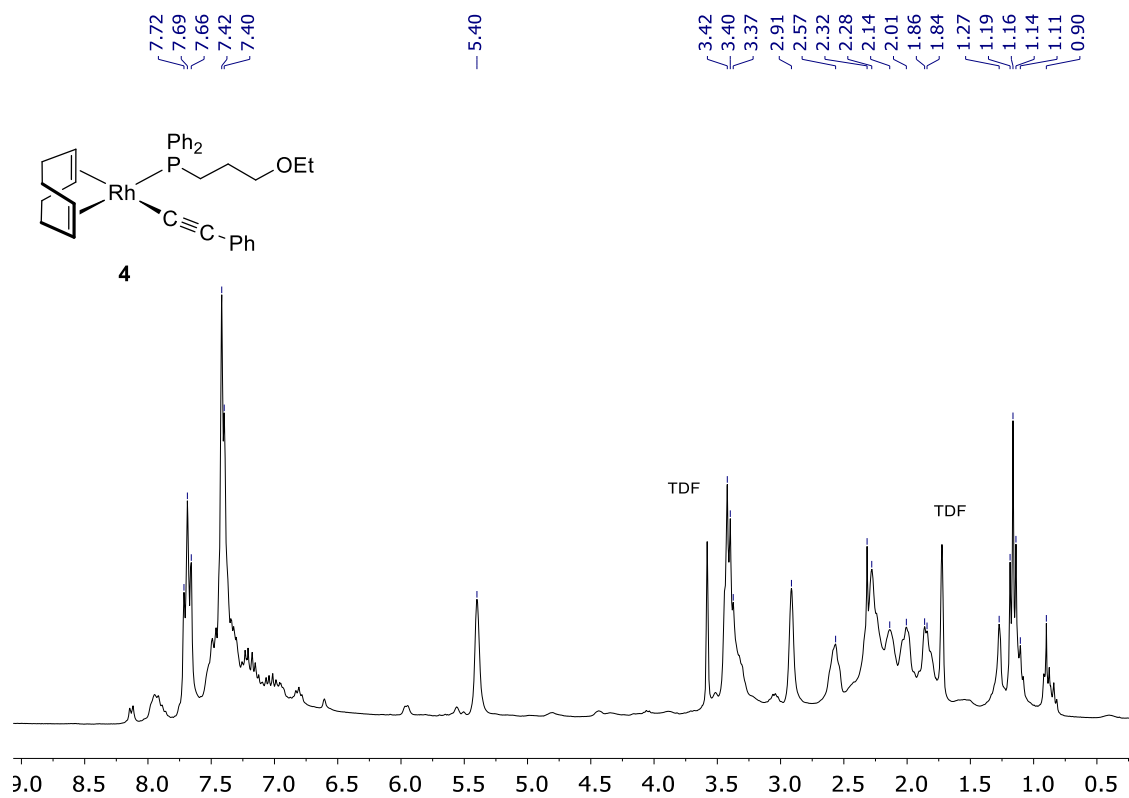

**Figure S11.**  $^1\text{H}$  NMR (300 MHz,  $\text{THF}-d_8$ , 233 K) of  $[\text{Rh}(\text{C}\equiv\text{C}-\text{Ph})(\text{cod})\{\text{Ph}_2\text{P}(\text{CH}_2)_3\text{OEt}\}]$  (**4**).

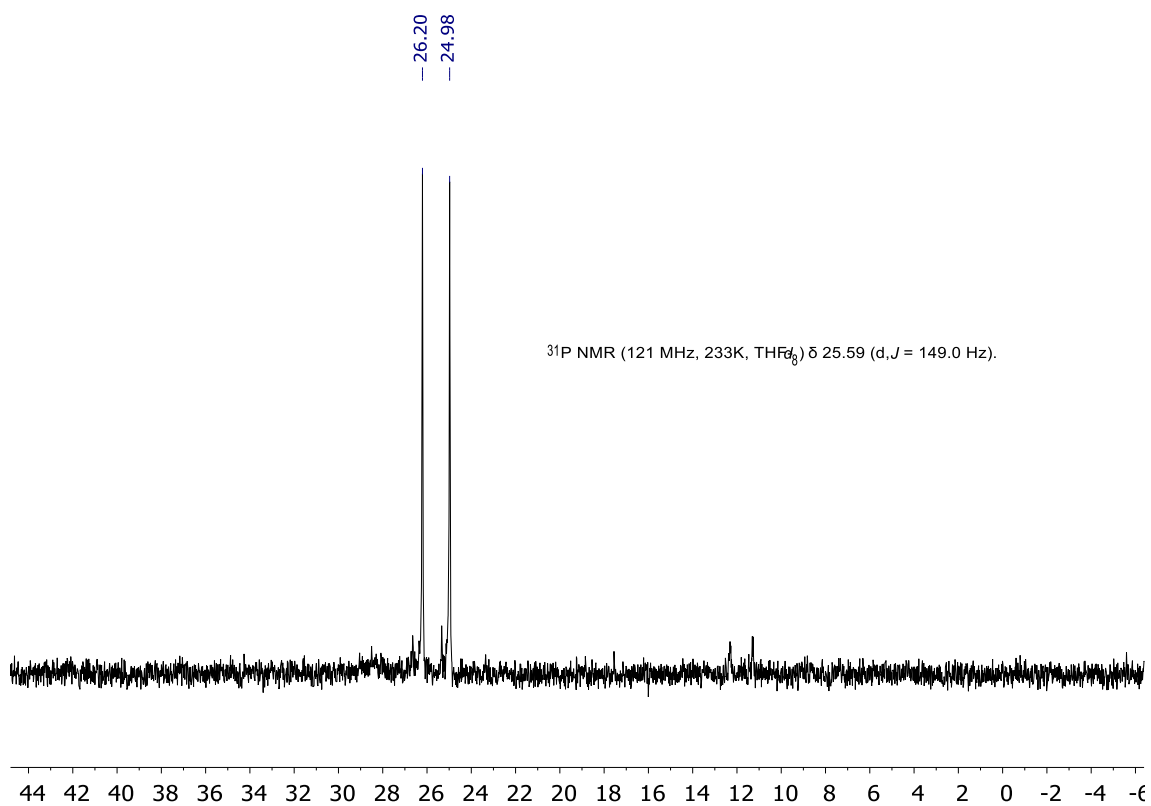

**Figure S12.**  $^{31}\text{P}\{^1\text{H}\}$  NMR (121 MHz,  $\text{THF}-d_8$ , 233 K) of  $[\text{Rh}(\text{C}\equiv\text{C}-\text{Ph})(\text{cod})\{\text{Ph}_2\text{P}(\text{CH}_2)_3\text{OEt}\}]$  (**4**).

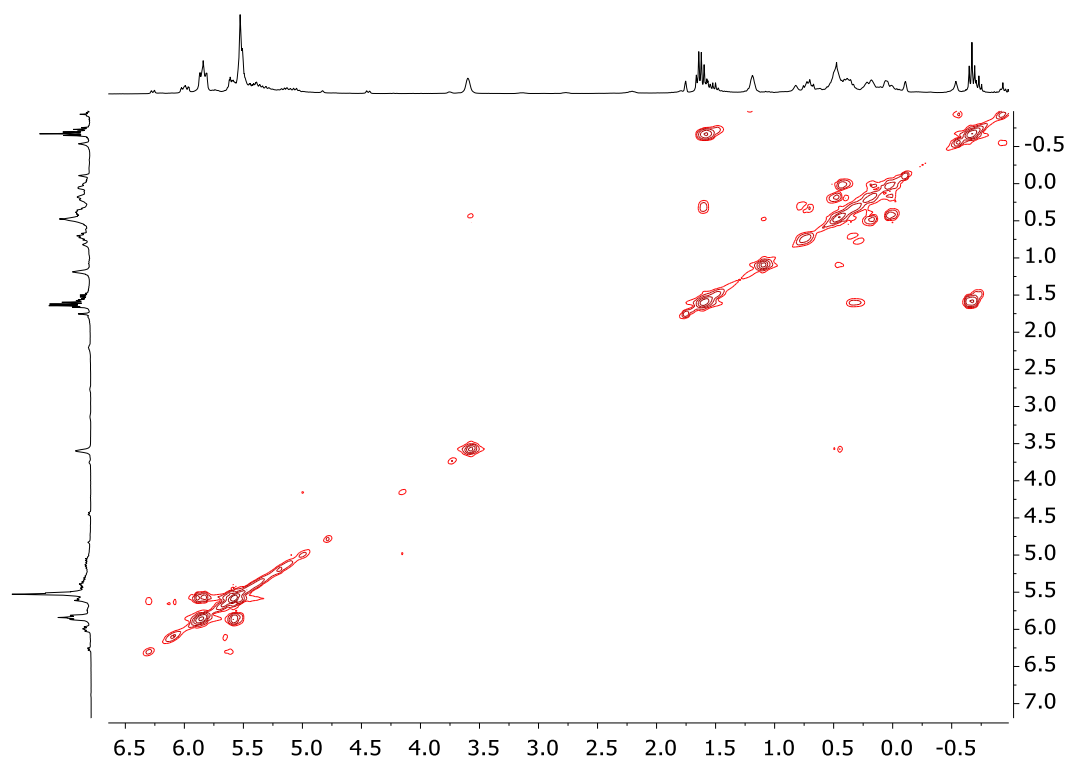

**Figure S13.**  $^1\text{H}/^1\text{H}$ -COSY NMR (THF- $d_8$ , 233 K) of  $[\text{Rh}(\text{C}\equiv\text{C}-\text{Ph})(\text{cod})\{\text{Ph}_2\text{P}(\text{CH}_2)_3\text{OEt}\}]$  (**4**).

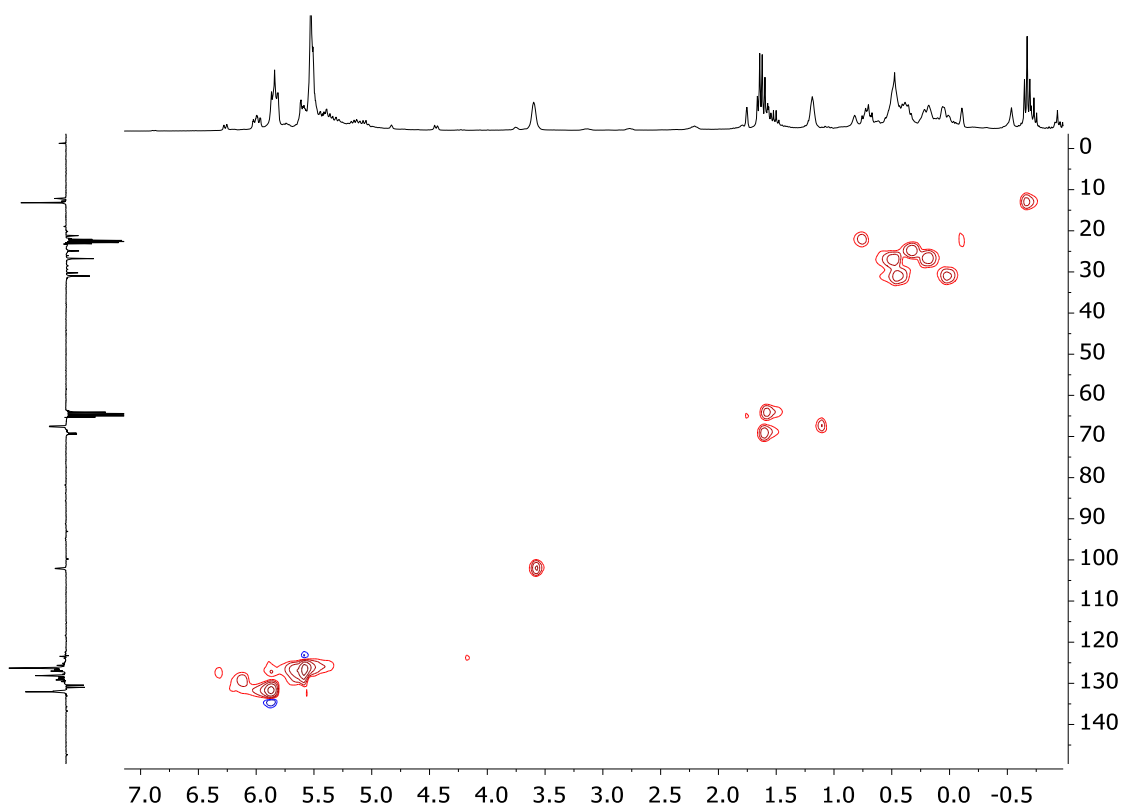

**Figure S14.**  $^1\text{H}/^{13}\text{C}$  HSQC NMR (THF- $d_8$ , 233 K) of  $[\text{Rh}(\text{C}\equiv\text{C}-\text{Ph})(\text{cod})\{\text{Ph}_2\text{P}(\text{CH}_2)_3\text{OEt}\}]$  (**4**).



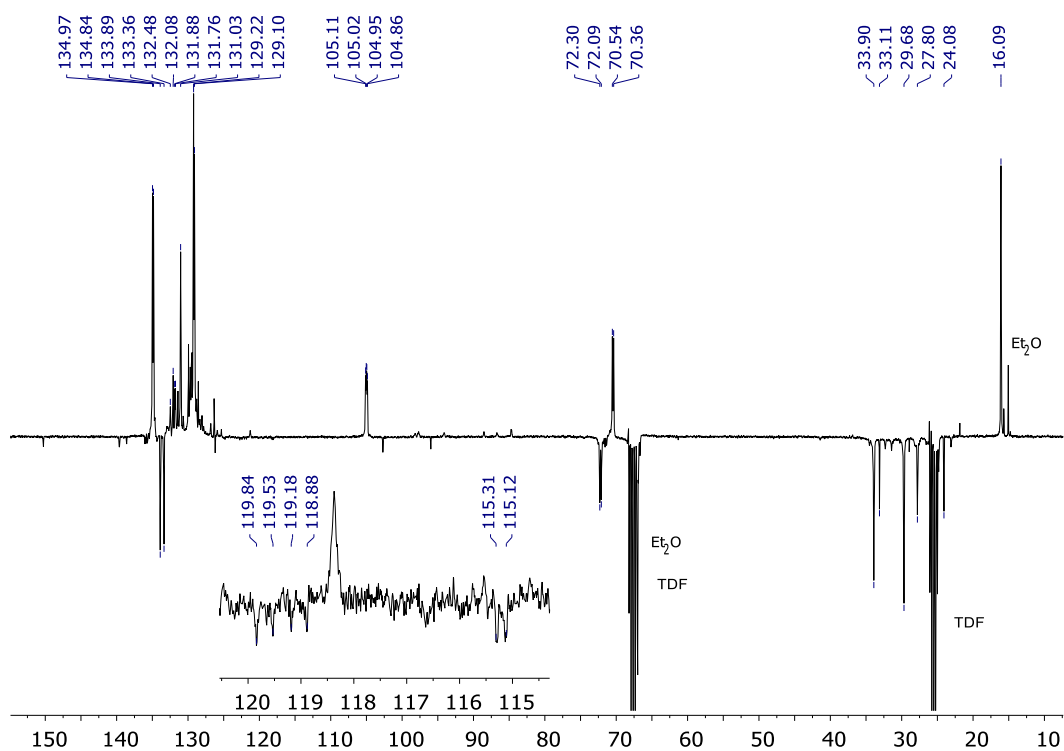

**Figure S15.**  $^{13}\text{C}\{^1\text{H}\}$  NMR (75 MHz, THF-*d*<sub>8</sub>, 233 K) of  $[\text{Rh}(\text{C}\equiv\text{C}-\text{Ph})(\text{cod})\{\text{Ph}_2\text{P}(\text{CH}_2)_3\text{OEt}\}]$  (**4**).

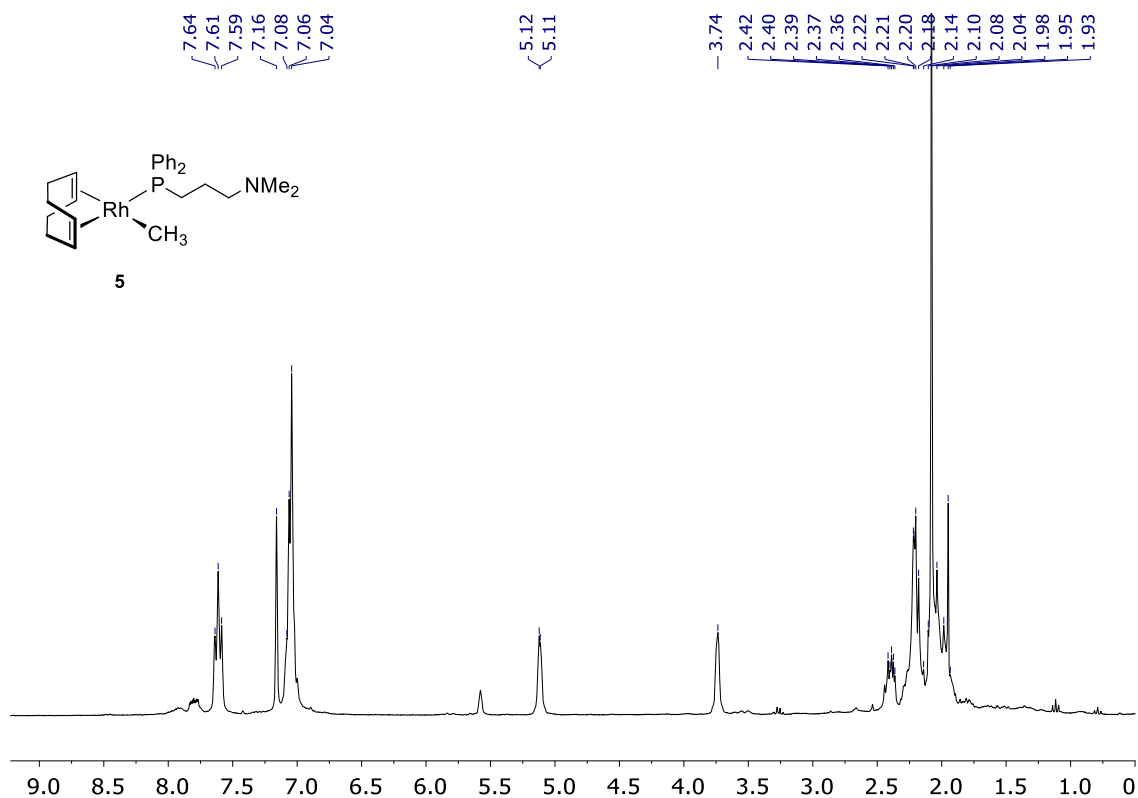

**Figure S16.**  $^1\text{H}$  NMR (300 MHz, C<sub>6</sub>D<sub>6</sub>, 298 K) of  $[\text{Rh}(\text{CH}_3)(\text{cod})\{\text{Ph}_2\text{P}(\text{CH}_2)_3\text{NMe}_2\}]$  (**5**).

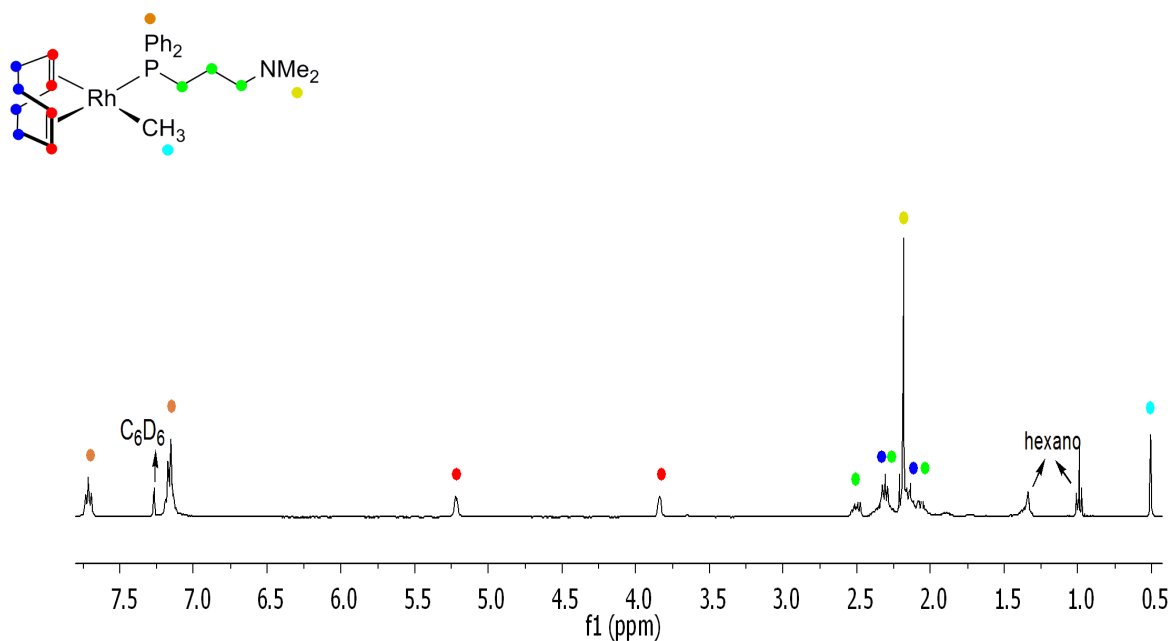

**Figure S17.**  $^1\text{H}$  NMR (300 MHz,  $\text{C}_6\text{D}_6$ , 298 K) of  $[\text{Rh}(\text{CH}_3)(\text{cod})\{\text{Ph}_2\text{P}(\text{CH}_2)_3\text{NMe}_2\}]$  (5).

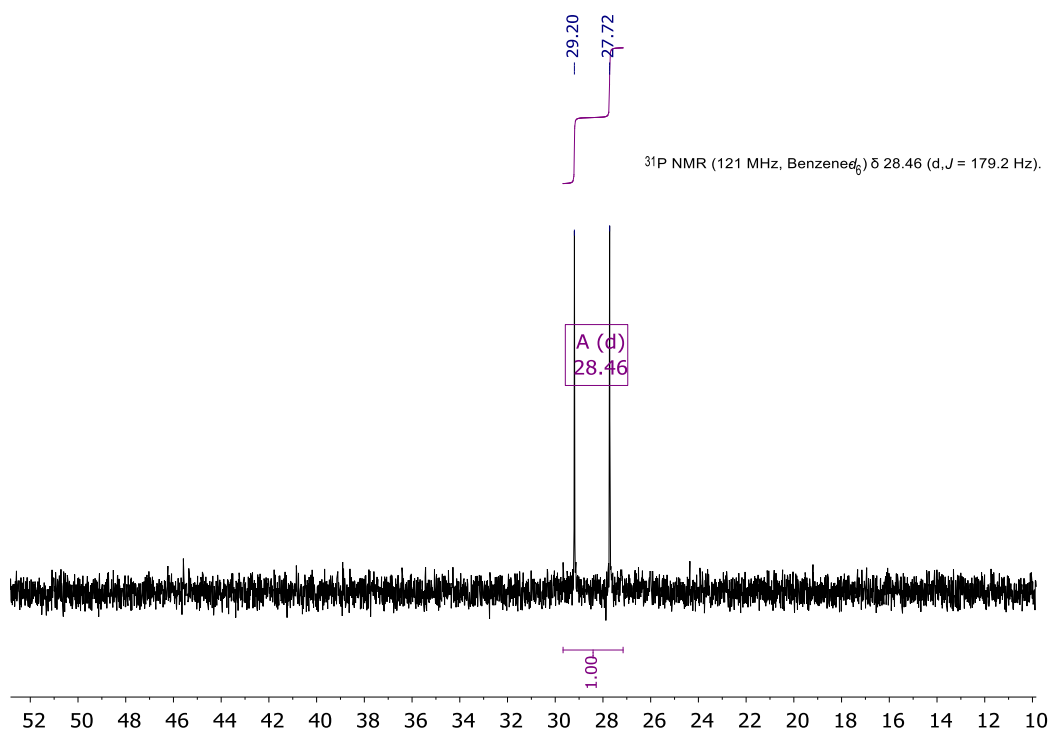

**Figure S18.**  $^{31}\text{P}\{^1\text{H}\}$  NMR (121 MHz,  $\text{C}_6\text{D}_6$ , 298 K) of  $[\text{Rh}(\text{CH}_3)(\text{cod})\{\text{Ph}_2\text{P}(\text{CH}_2)_3\text{NMe}_2\}]$  (5).

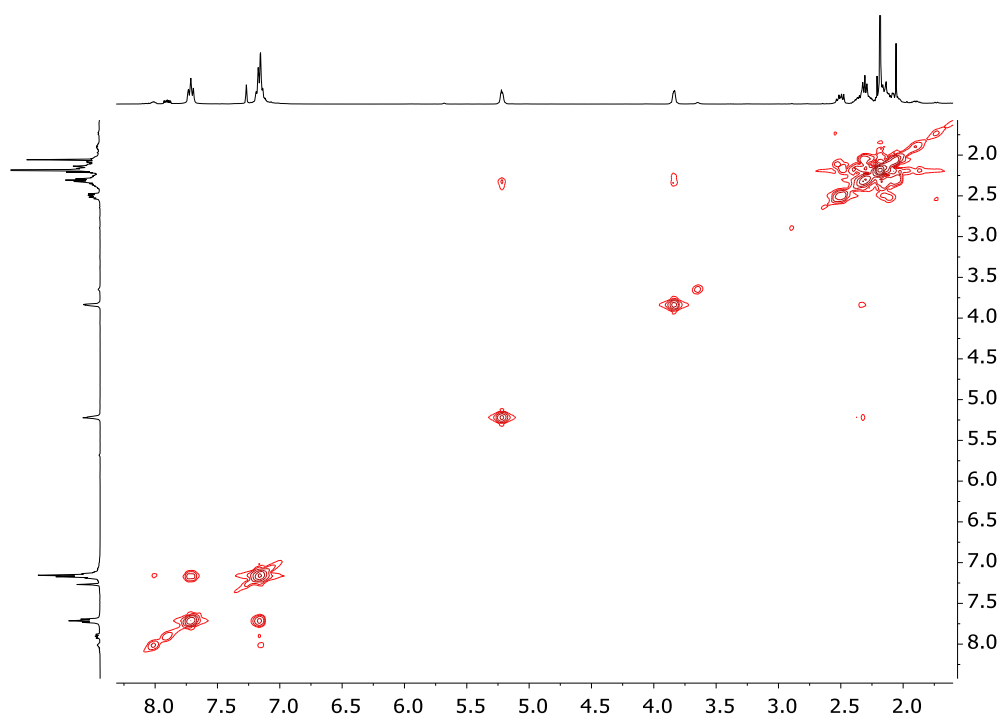

**Figure S19.**  $^1\text{H}/^1\text{H}$ -COSY NMR ( $\text{C}_6\text{D}_6$ , 298 K) of  $[\text{Rh}(\text{CH}_3)(\text{cod})\{\text{Ph}_2\text{P}(\text{CH}_2)_3\text{NMe}_2\}]$  (**5**).

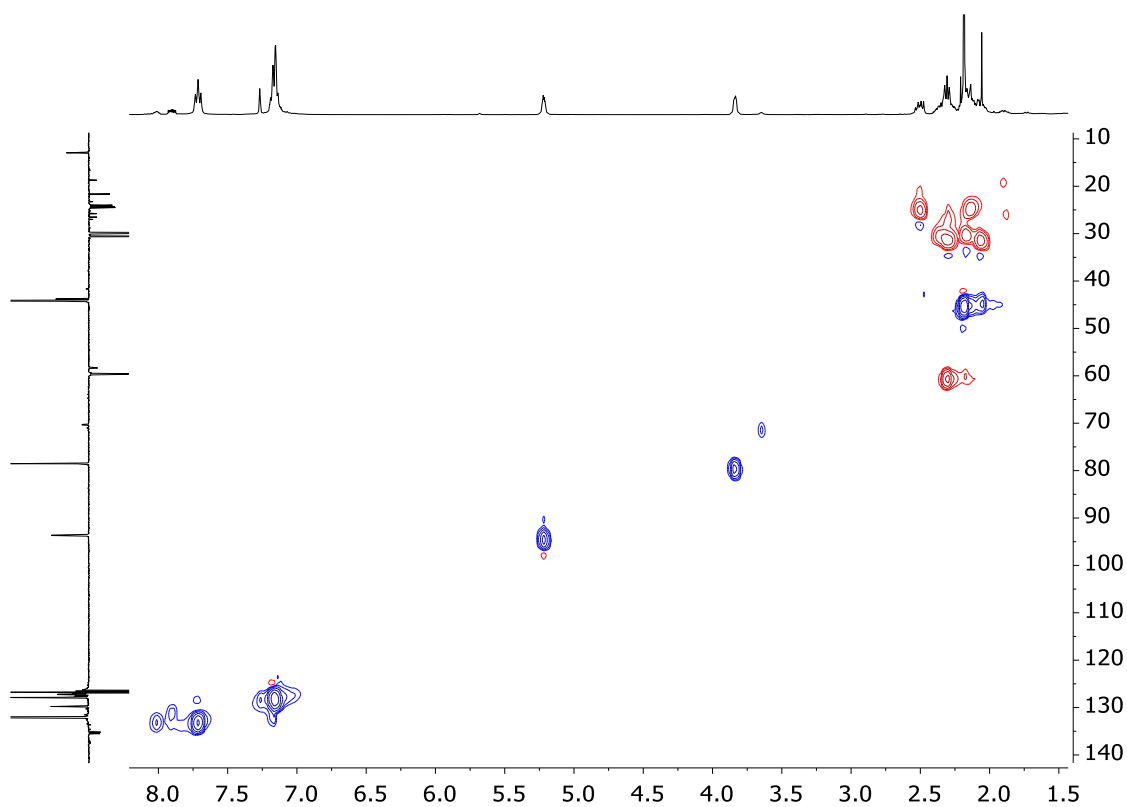

**Figure S20.**  $^1\text{H}/^{13}\text{C}$  HSQC NMR ( $\text{C}_6\text{D}_6$ , 298 K) of  $[\text{Rh}(\text{CH}_3)(\text{cod})\{\text{Ph}_2\text{P}(\text{CH}_2)_3\text{NMe}_2\}]$  (**5**).

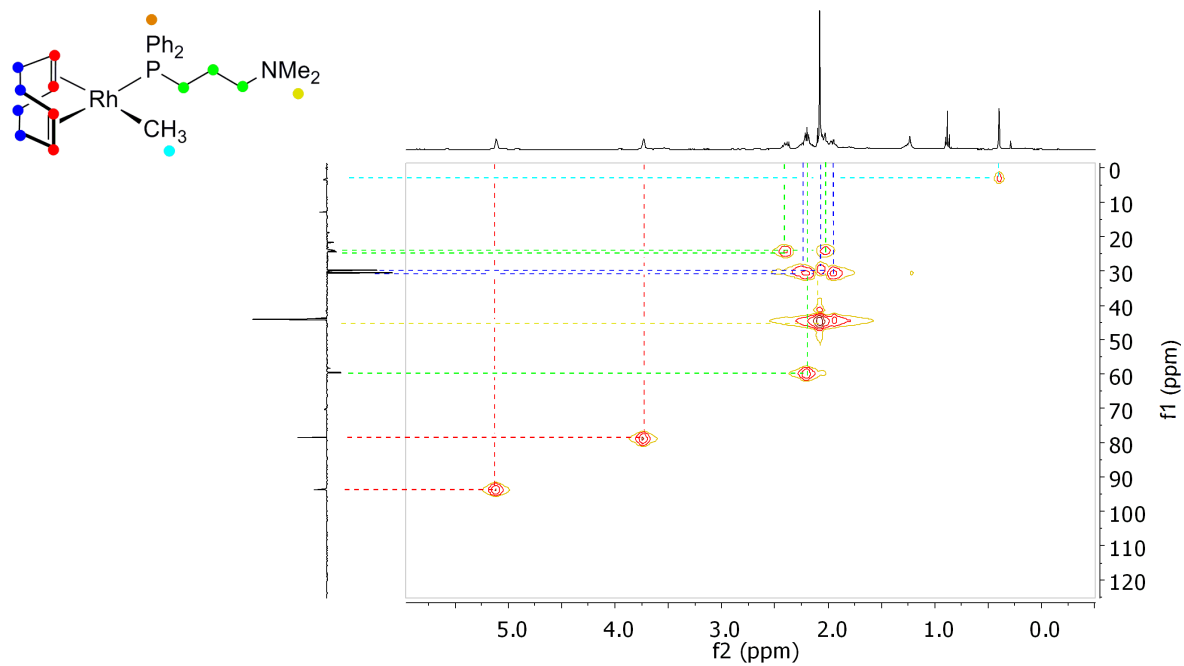

**Figure S21.** Expansion of the  $^1\text{H}/^{13}\text{C}$  HSQC NMR ( $\text{C}_6\text{D}_6$ , 298 K) of **5** from 0 to 6 ppm in  $^1\text{H}$ .

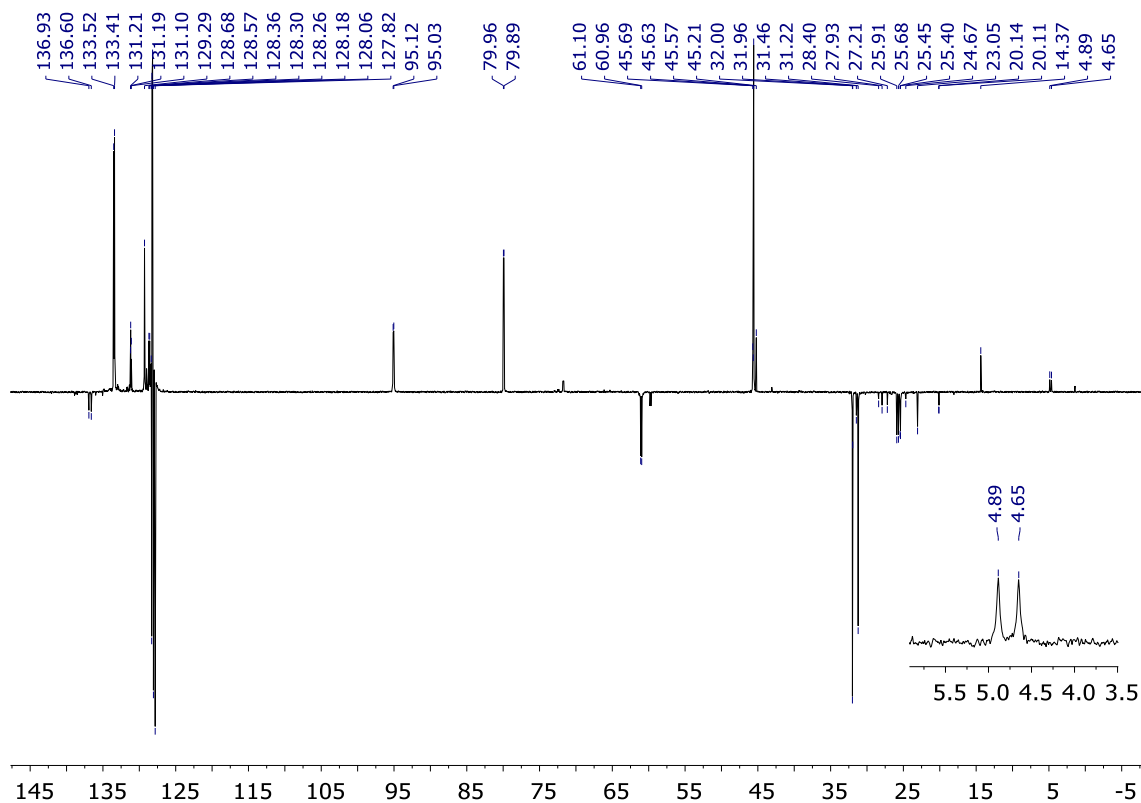

**Figure S22.**  $^{13}\text{C}\{^1\text{H}\}$  NMR (75 MHz,  $\text{C}_6\text{D}_6$ , 298 K) of  $[\text{Rh}(\text{CH}_3)(\text{cod})\{\text{Ph}_2\text{P}(\text{CH}_2)_3\text{NMe}_2\}]$  (**5**).

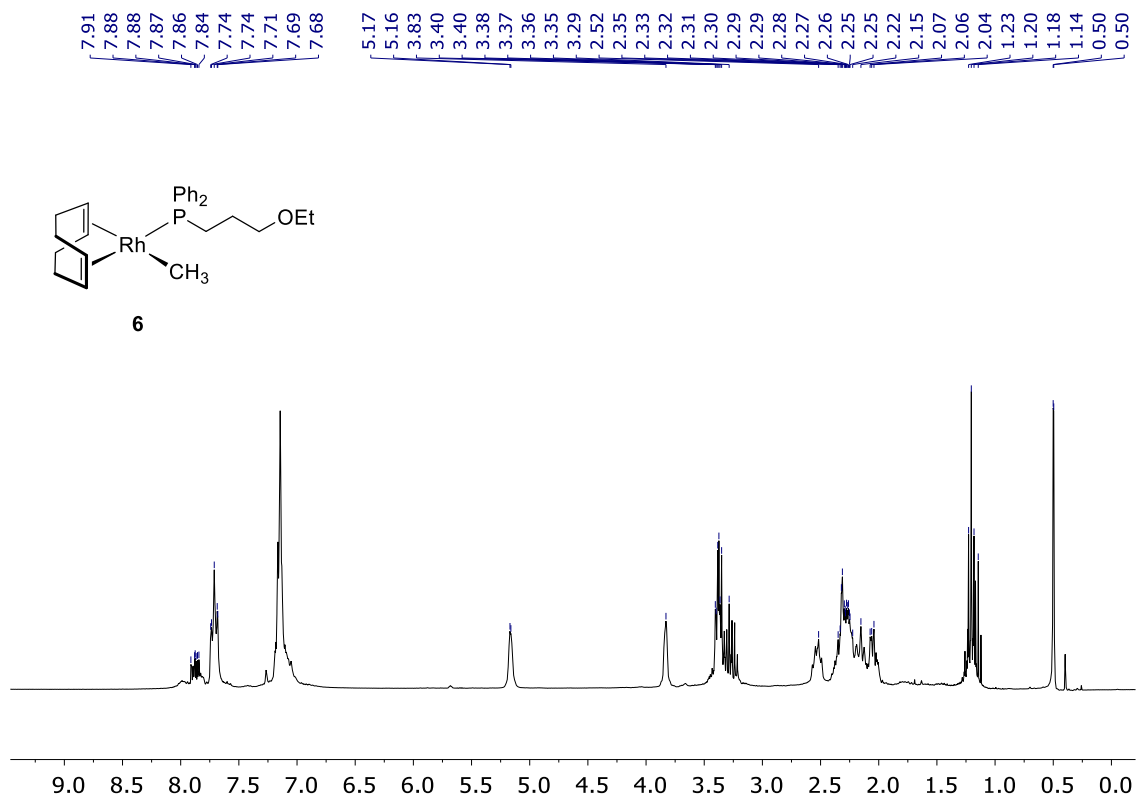

**Figure S23.**  $^1\text{H}$  NMR (300 MHz,  $\text{C}_6\text{D}_6$ , 298 K) of  $[\text{Rh}(\text{CH}_3)(\text{cod})\{\text{Ph}_2\text{P}(\text{CH}_2)_3\text{OEt}\}]$  (**6**).

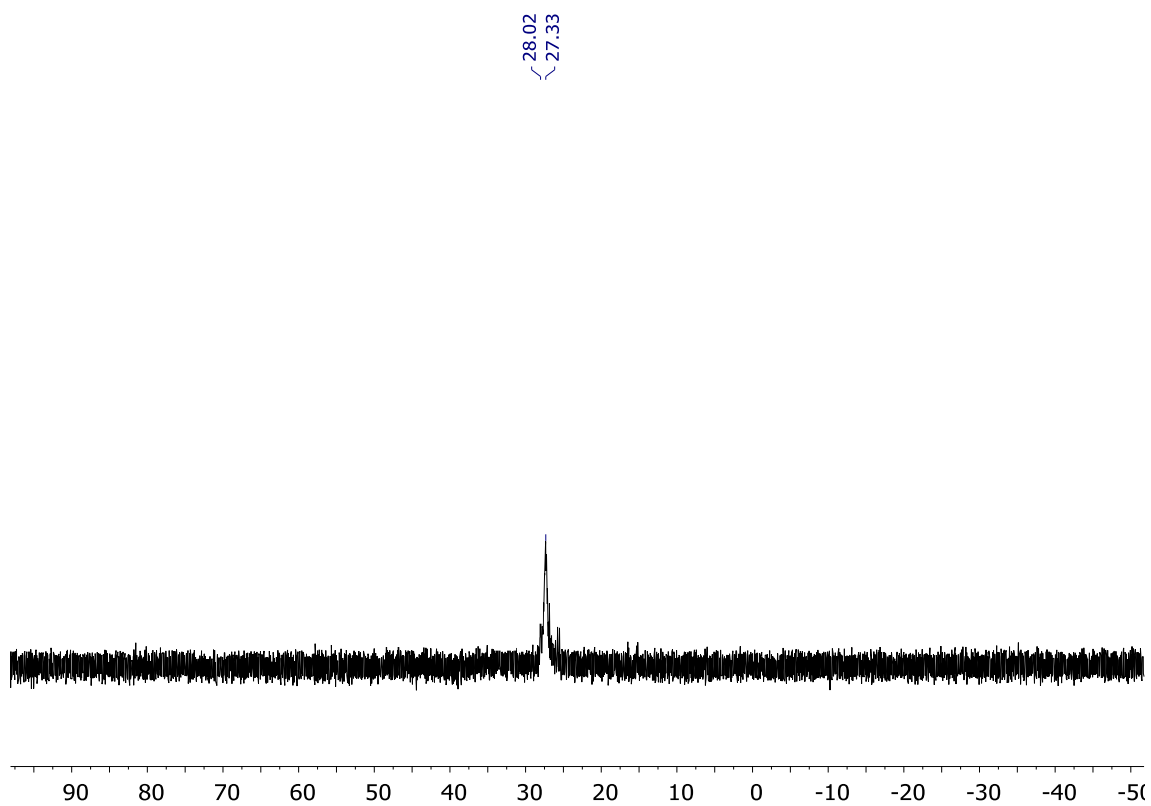

**Figure S24.**  $^{31}\text{P}\{^1\text{H}\}$  NMR (121 MHz,  $\text{C}_6\text{D}_6$ , 298 K) of  $[\text{Rh}(\text{CH}_3)(\text{cod})\{\text{Ph}_2\text{P}(\text{CH}_2)_3\text{OEt}\}]$  (**6**).

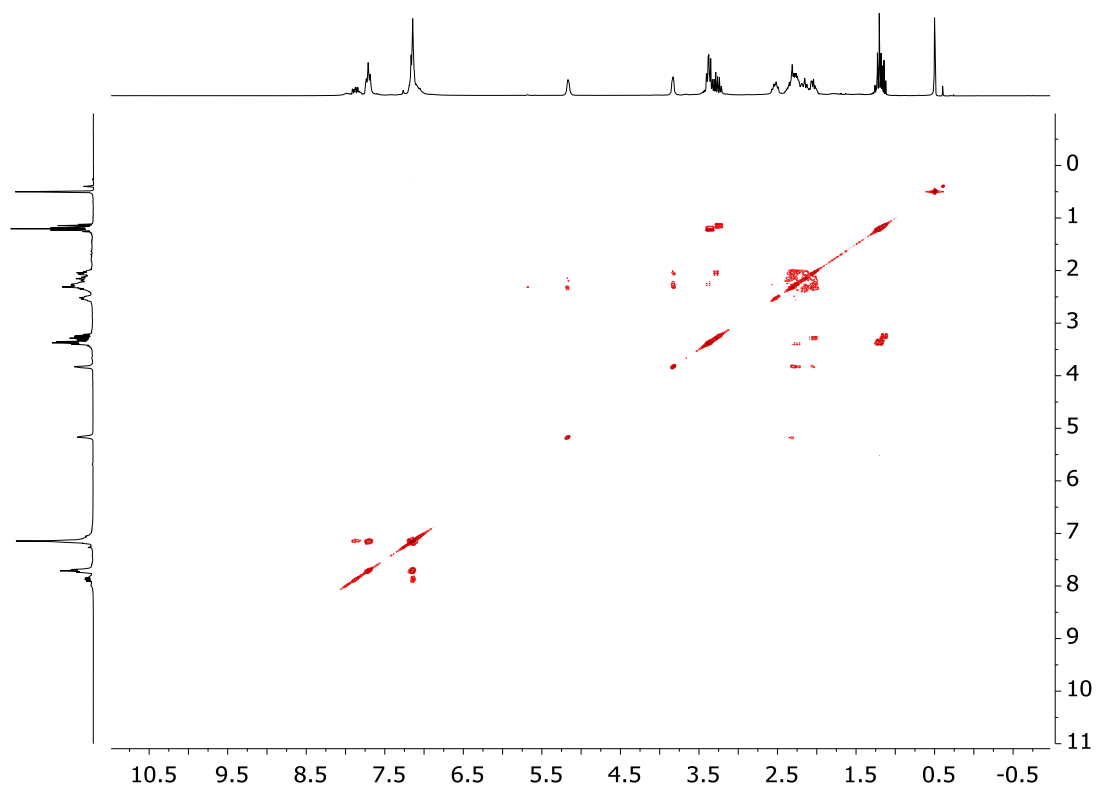

**Figure S25.**  $^1\text{H}/^1\text{H}$ -COSY NMR ( $\text{C}_6\text{D}_6$ , 298 K) of  $[\text{Rh}(\text{CH}_3)(\text{cod})\{\text{Ph}_2\text{P}(\text{CH}_2)_3\text{OEt}\}]$  (**6**).

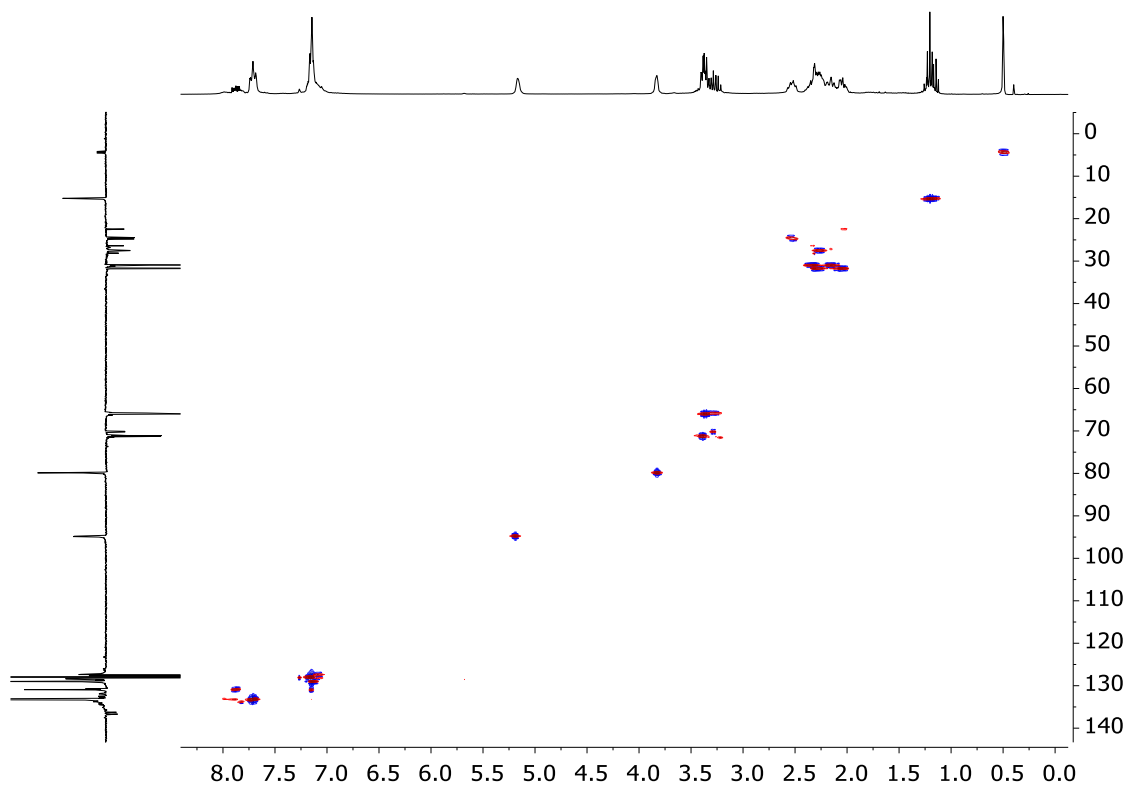

**Figure S26.**  $^1\text{H}/^{13}\text{C}$  HSQC NMR ( $\text{C}_6\text{D}_6$ , 298 K) of  $[\text{Rh}(\text{CH}_3)(\text{cod})\{\text{Ph}_2\text{P}(\text{CH}_2)_3\text{OEt}\}]$  (**6**).

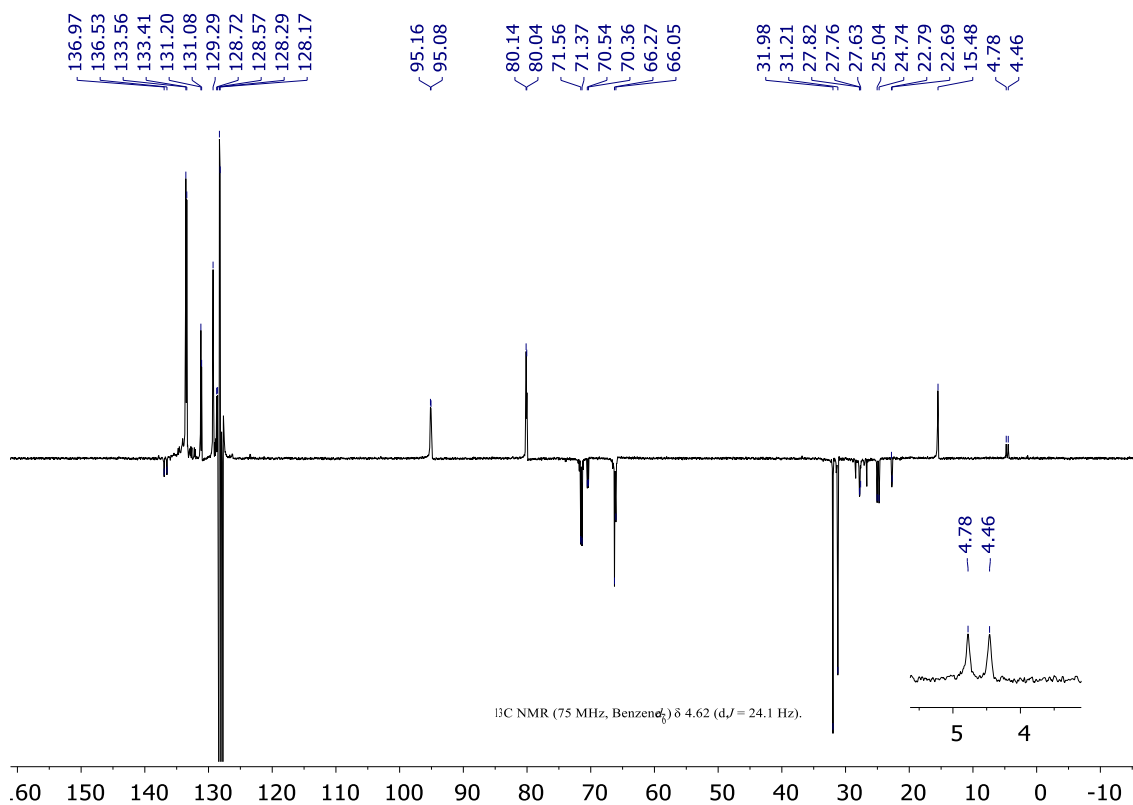

**Figure S27.**  $^{13}\text{C}\{^1\text{H}\}$  NMR (75 MHz,  $\text{C}_6\text{D}_6$ , 298 K) of  $[\text{Rh}(\text{CH}_3)(\text{cod})\{\text{Ph}_2\text{P}(\text{CH}_2)_3\text{OEt}\}]$  (**6**).

## 2.- ESI-MS of alkynyl and methyl rhodium complexes.

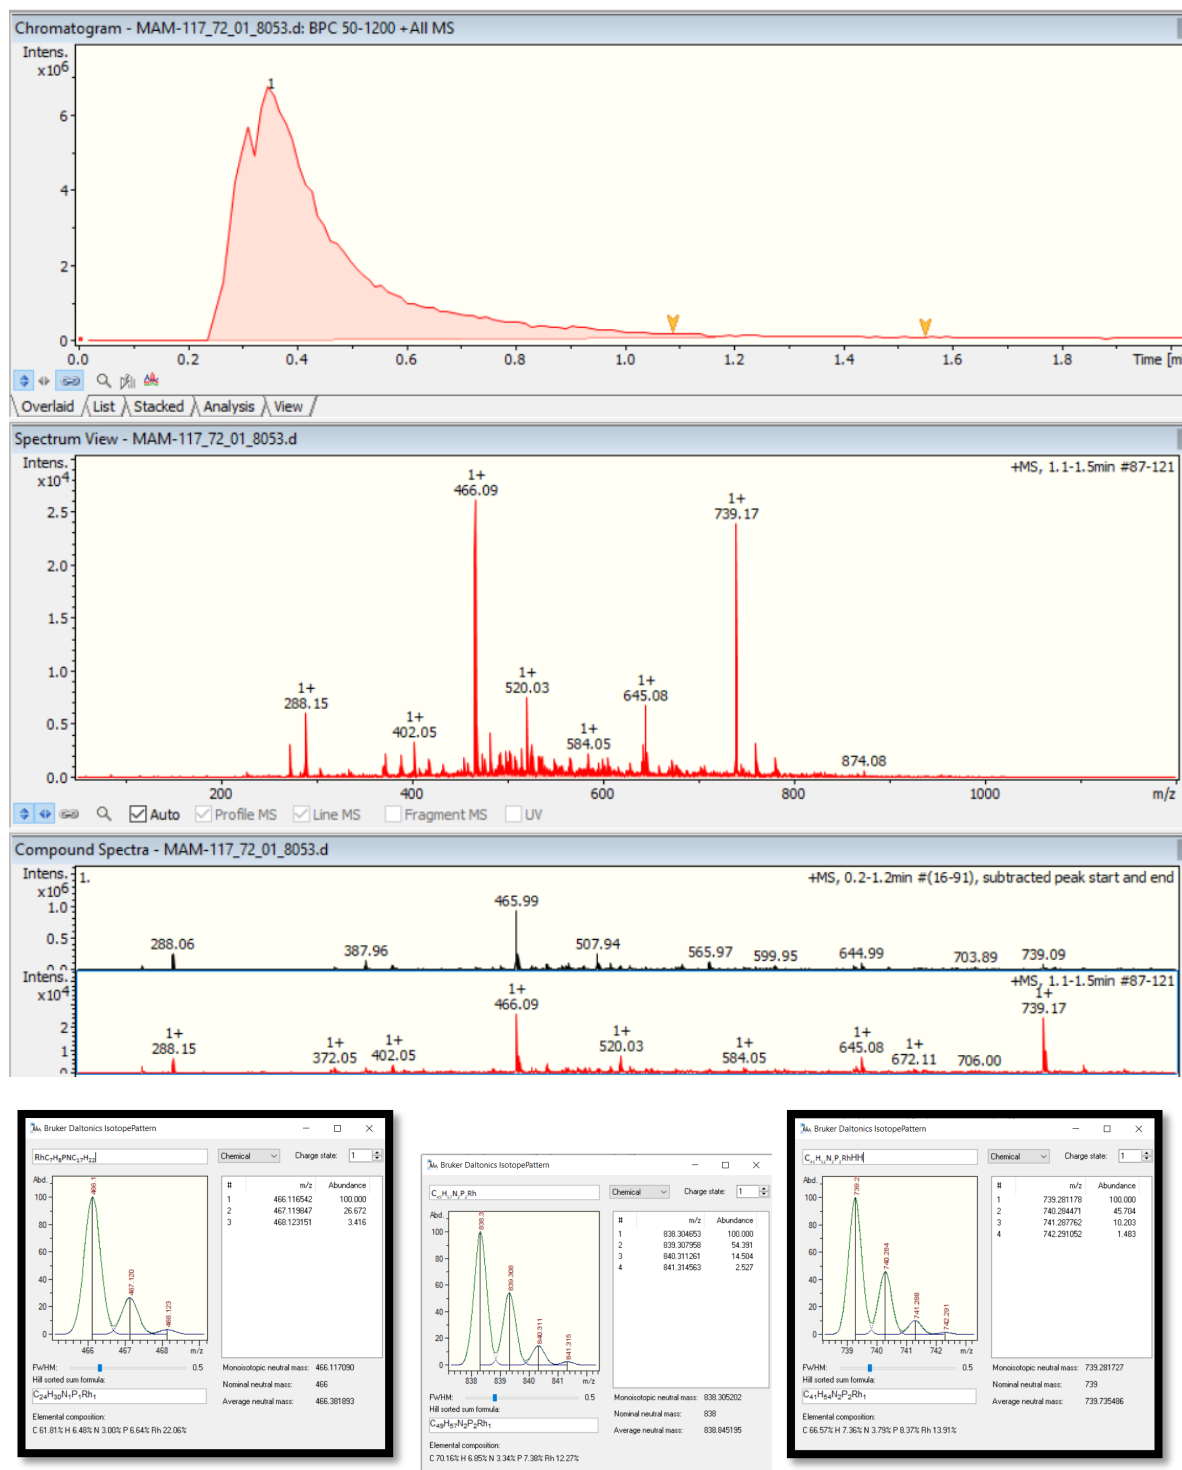

**Figure S28.** ESI-MS of  $[\text{Rh}(\text{C}\equiv\text{C}-\text{Ph})(\text{nbd})\{\text{Ph}_2\text{P}(\text{CH}_2)_3\text{NMe}_2\}_2]$  (**1**) (ESI+, CH<sub>3</sub>CN,  $m/z$ , %): 466.1 ( $[\text{Rh}(\text{nbd})\{\text{Ph}_2\text{P}(\text{CH}_2)_3\text{NMe}_2\}]^+$ , 100), 739.1 ( $[\text{M} - \text{C}\equiv\text{C}-\text{Ph} + 2\text{H}]^+$ , 90).



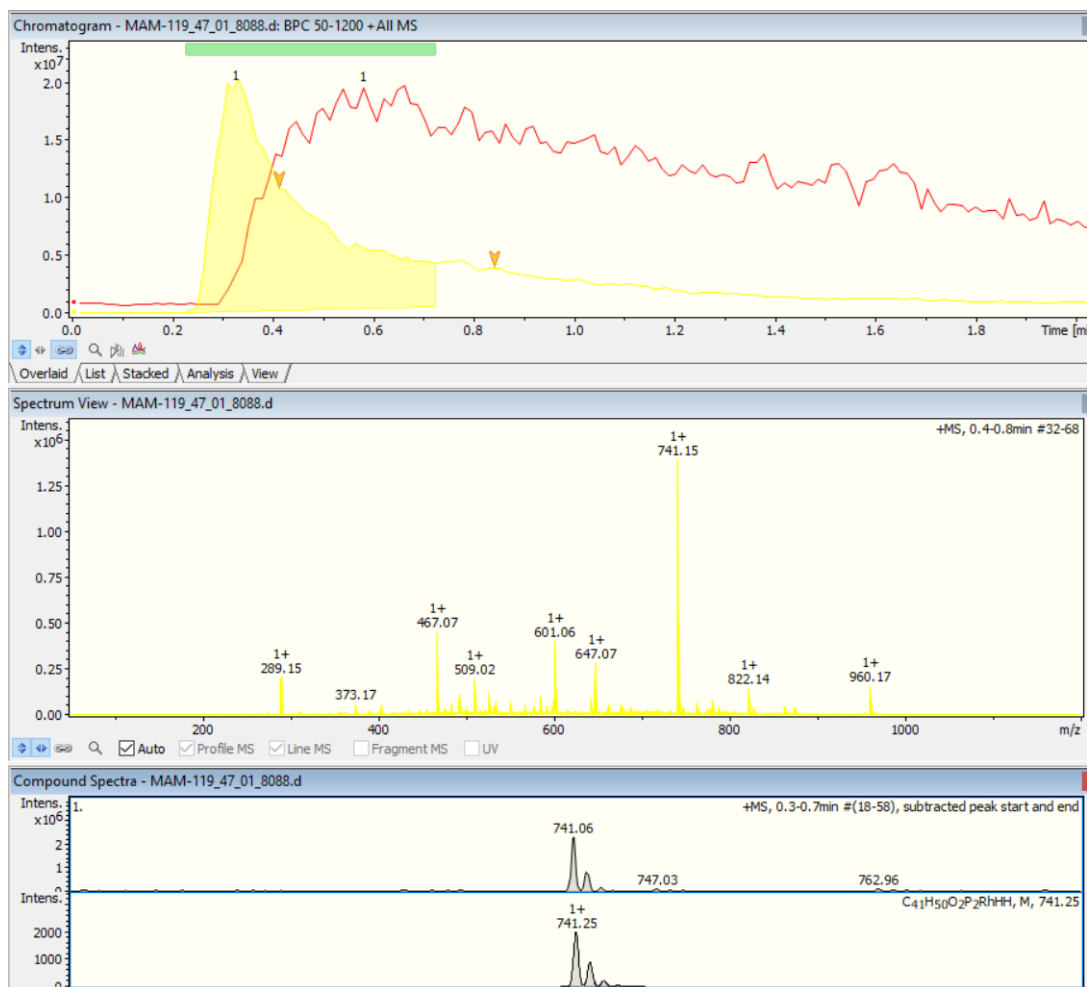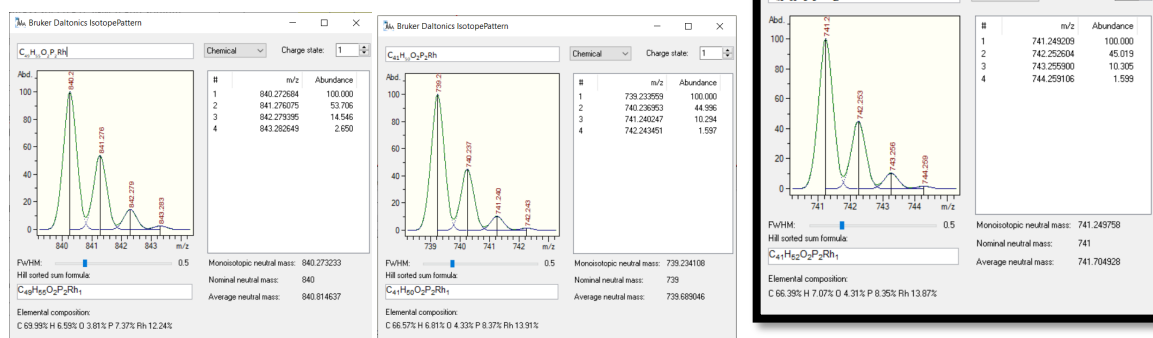

**Figure S29.** ESI-MS of  $[\text{Rh}(\text{C}\equiv\text{C-Ph})(\text{nb})\{\text{Ph}_2\text{P}(\text{CH}_2)_3\text{OEt}\}_2]$  (**2**) MS (ESI+,  $\text{CH}_3\text{CN}$ ,  $m/z$ , %): 741.1 ( $[\text{M} - \text{C}\equiv\text{C-Ph} + 2\text{H}]^+$ , 100).

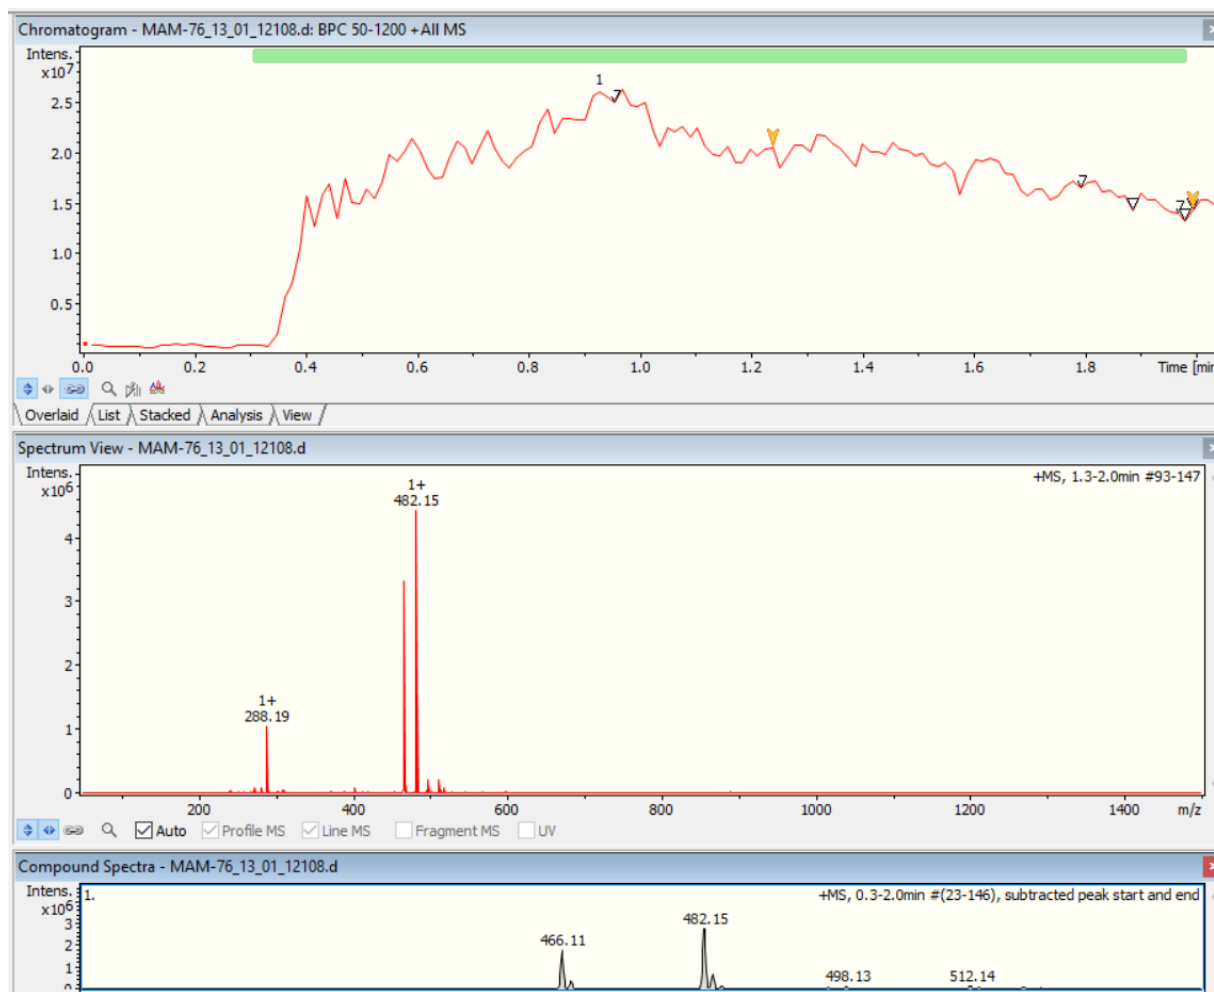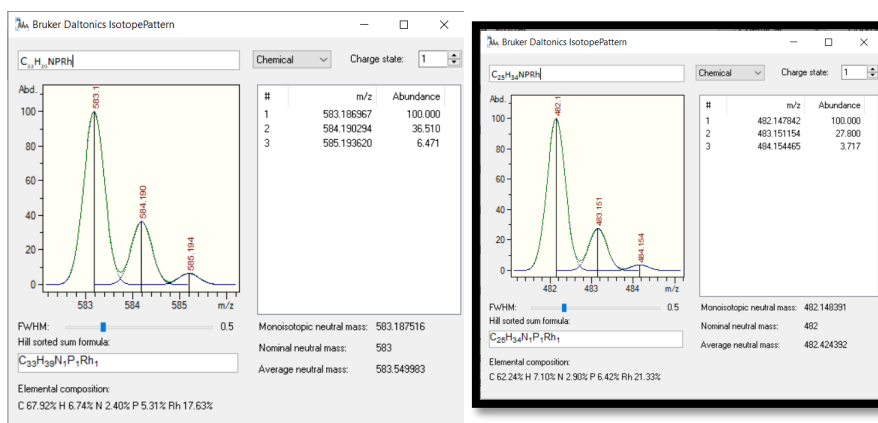

**Figure S30.** ESI-MS of  $[Rh(C\equiv C-Ph)(cod)\{Ph_2P(CH_2)_3NMe_2\}]$  (**3**) (ESI+, THF,  $m/z$ , %): 482.1 ( $[M - C\equiv C-Ph]^+$ , 100).

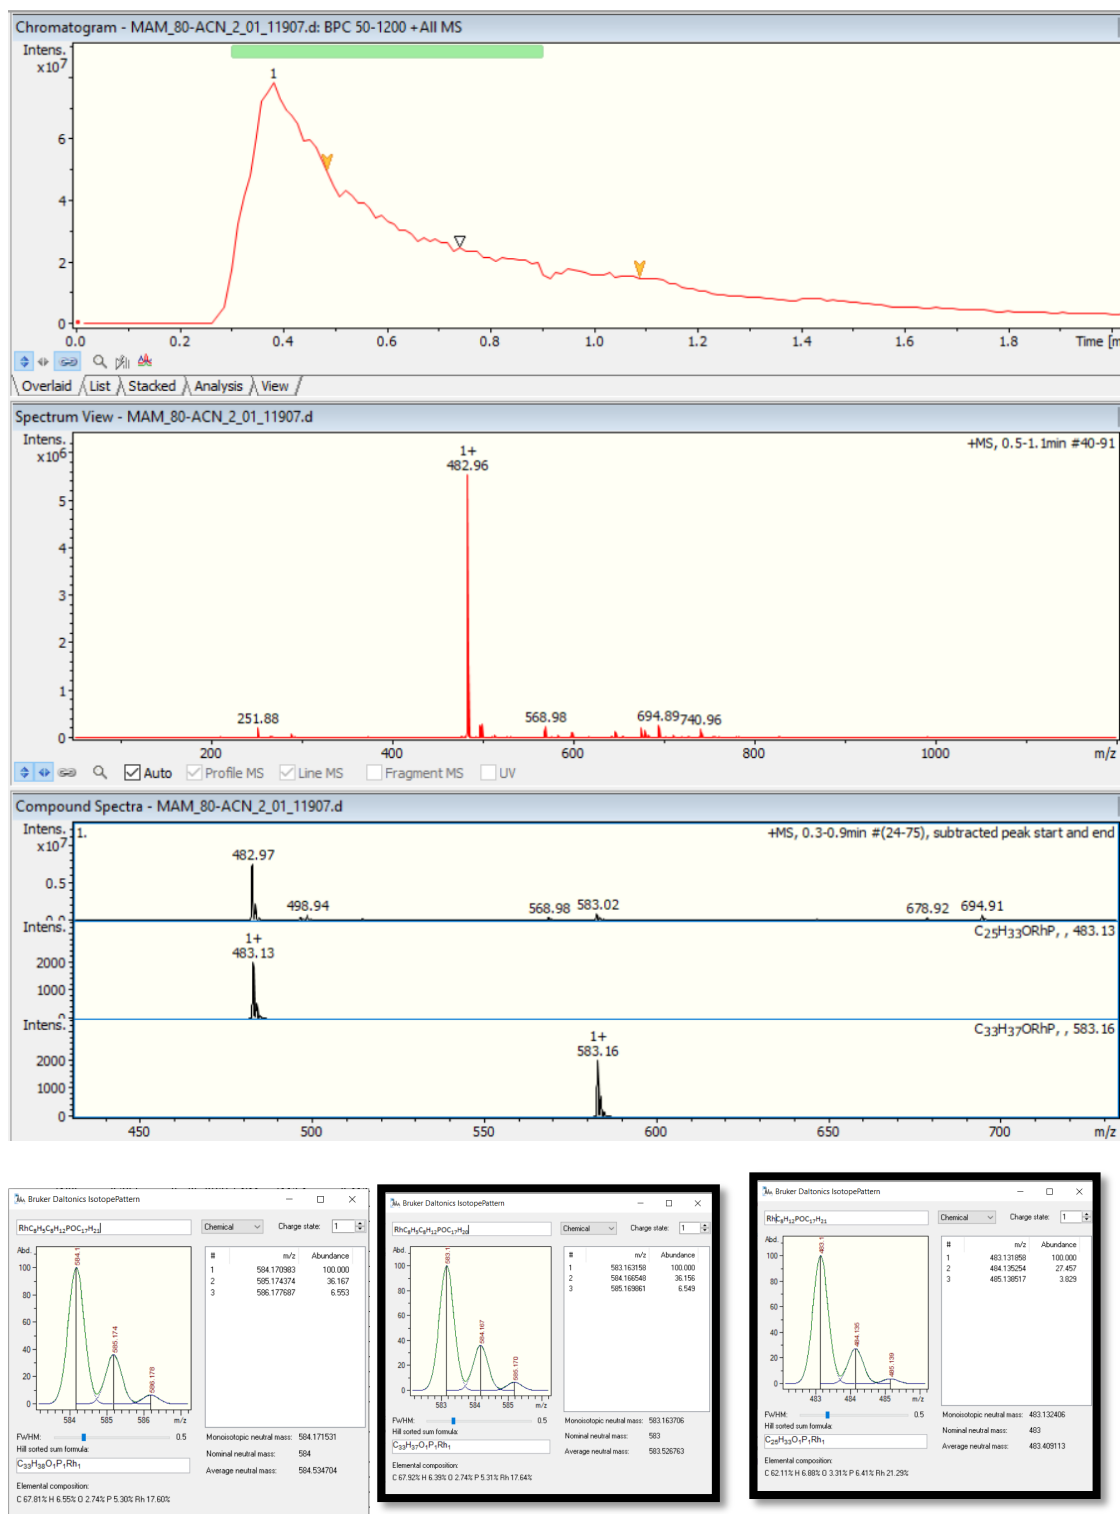

**Figure S31.** ESI-MS of  $[Rh(C\equiv C-Ph)(cod)\{Ph_2P(CH_2)_3OEt\}]$  (**4**) (ESI+, THF,  $m/z$ , %): 583.1 ( $[M]^+$ , 8), 483.1 ( $[M - C\equiv CC_6H_5]^+$ , 100).

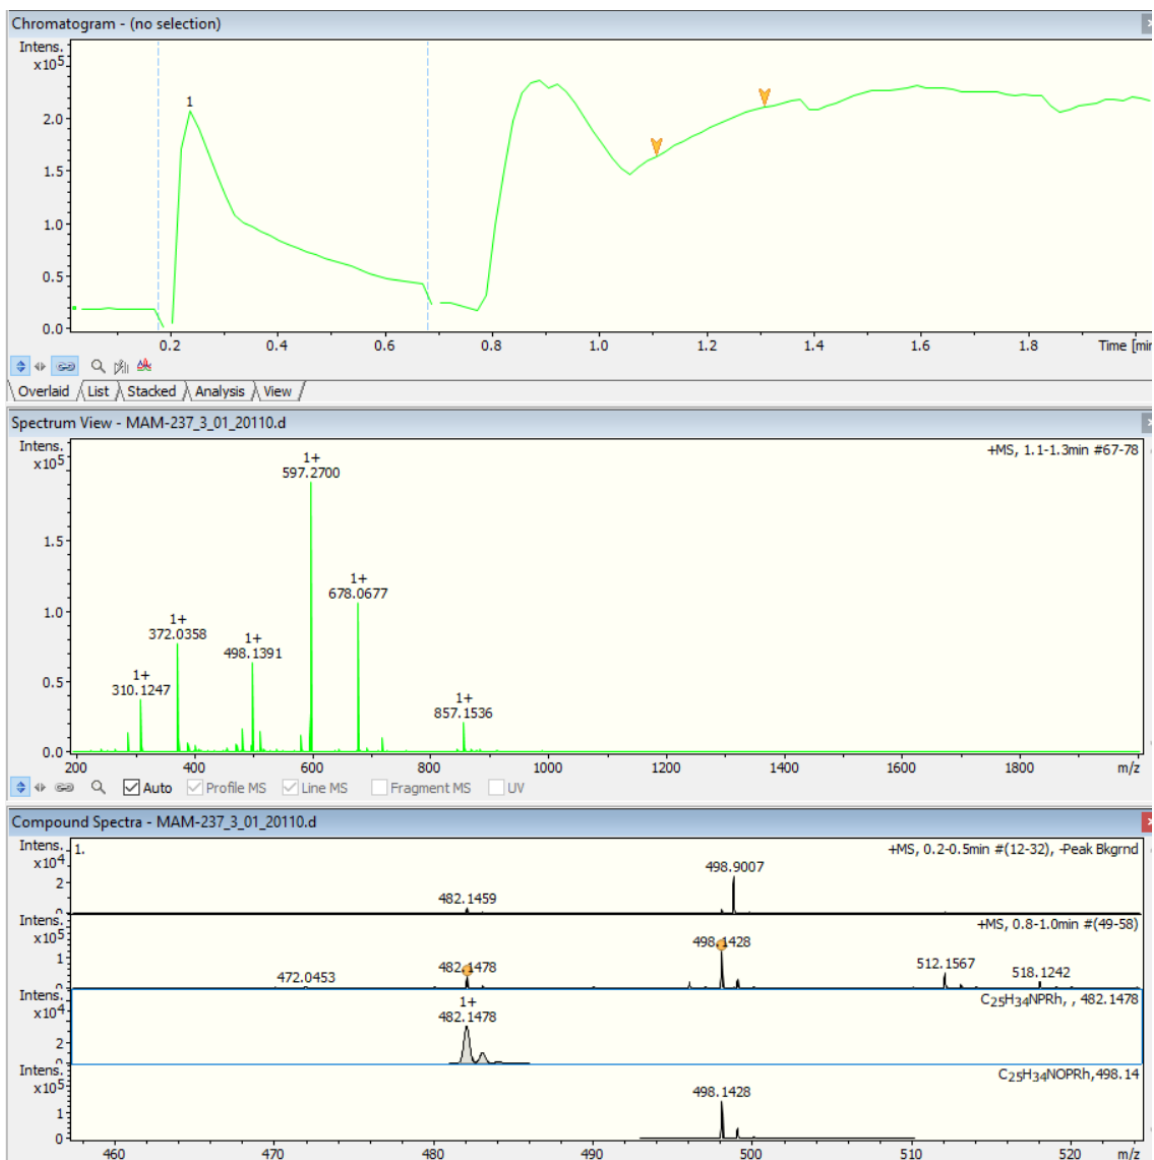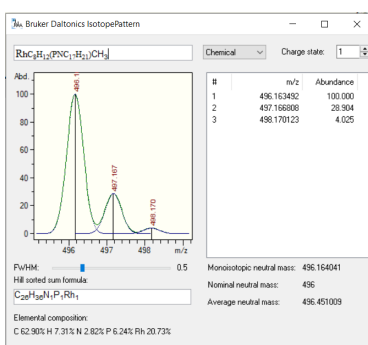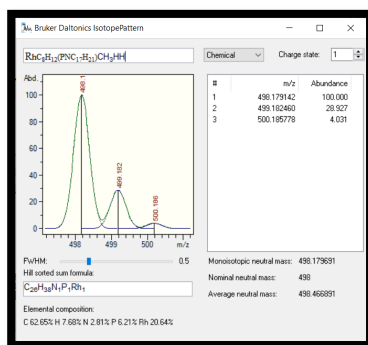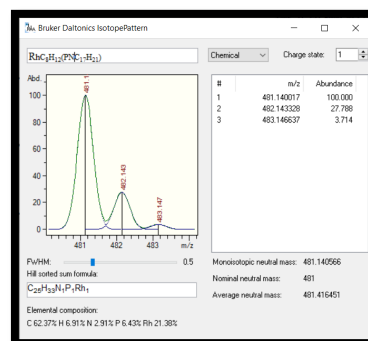

**Figure S32.** ESI-MS of  $[\text{Rh}(\text{CH}_3)(\text{cod})\{\text{Ph}_2\text{P}(\text{CH}_2)_3\text{NMe}_2\}]$  (**5**) (ESI+, THF,  $m/z$ , %): 498.1 ( $[\text{M}+2\text{H}]^+$ , 3), 482.1 ( $[\text{M}-\text{CH}_3]^+$ , 20).

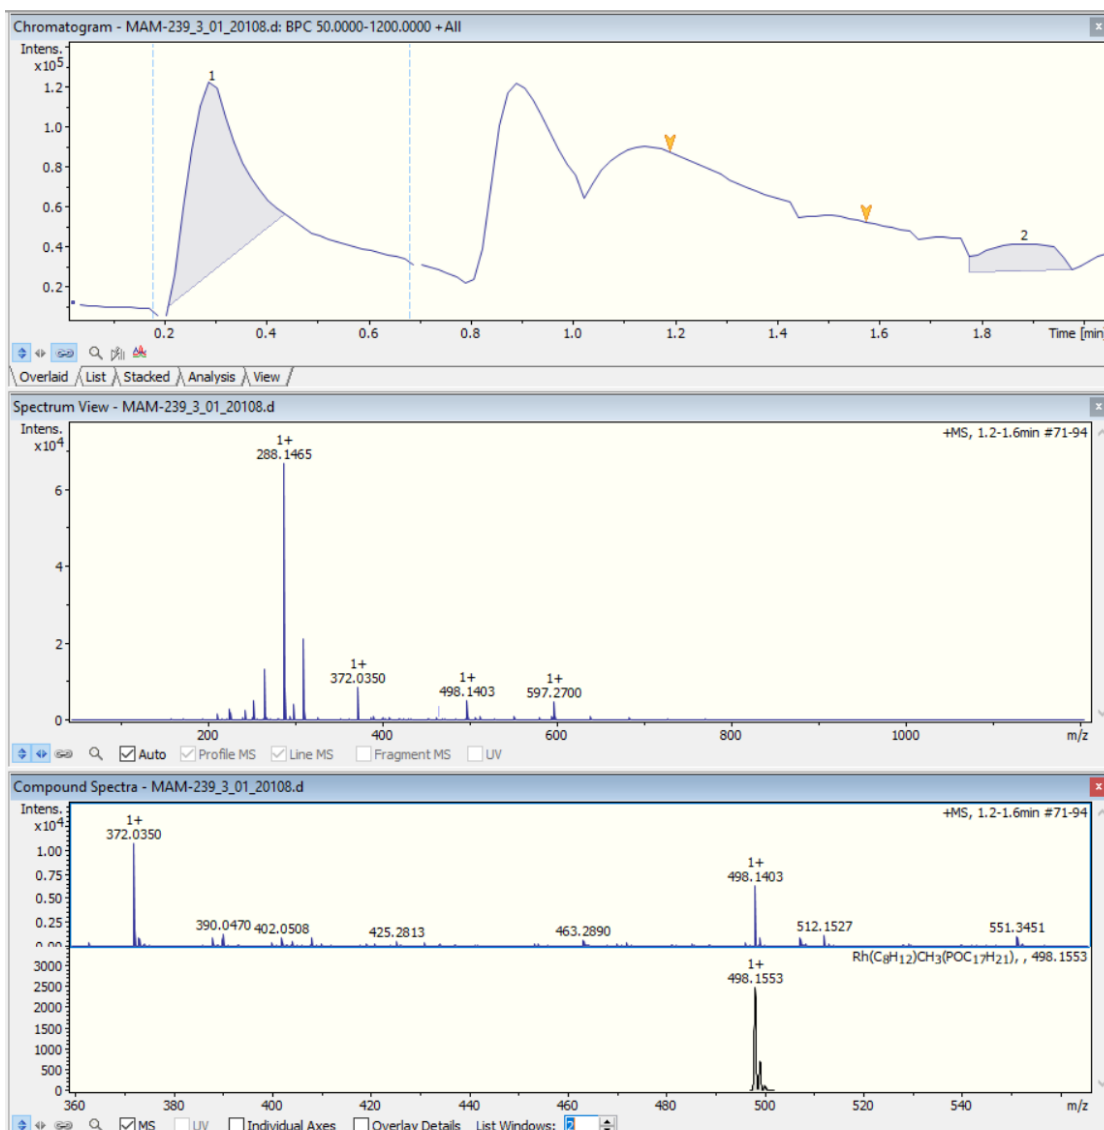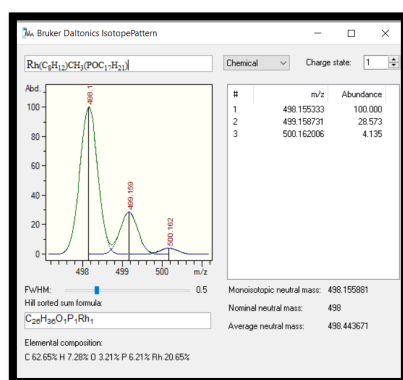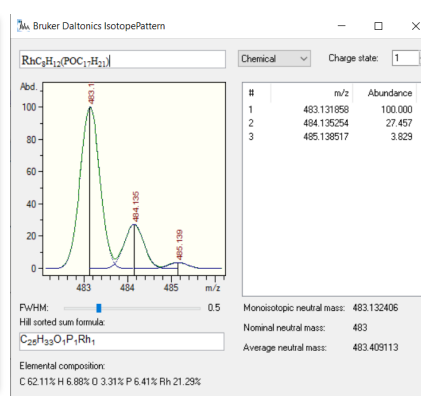

**Figure S33.** ESI-MS of [Rh(CH<sub>3</sub>)(cod){Ph<sub>2</sub>P(CH<sub>2</sub>)<sub>3</sub>OEt}] (**6**) (ESI+, THF, m/z, %): 498.1 ([M]<sup>+</sup>, 10).

### 3.- Polyphenylacetylene characterization.

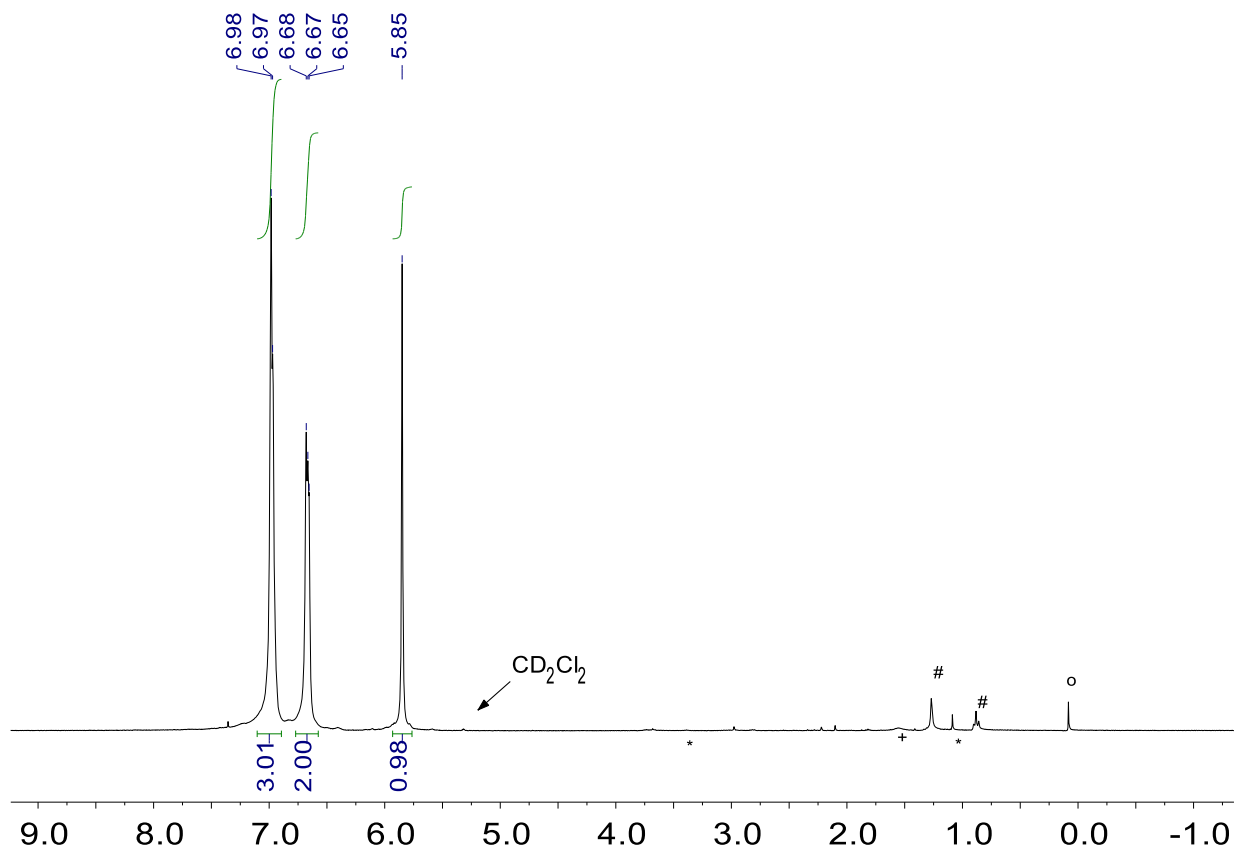

**Figure S34.** <sup>1</sup>H NMR (CD<sub>2</sub>Cl<sub>2</sub>, 298 K) of a representative PPA sample (cis-content 98 %).<sup>1</sup>

\* methanol, + H<sub>2</sub>O, # H grease, O silicone grease.<sup>2</sup>

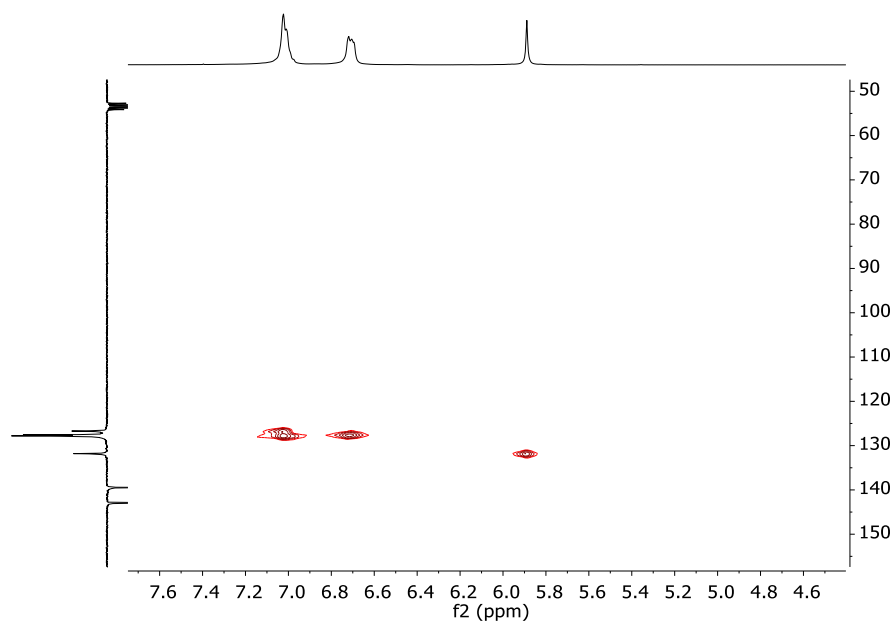

**Figure S35.** <sup>1</sup>H/<sup>13</sup>C HSQC NMR (CD<sub>2</sub>Cl<sub>2</sub>, 298 K) of a representative PPA sample.

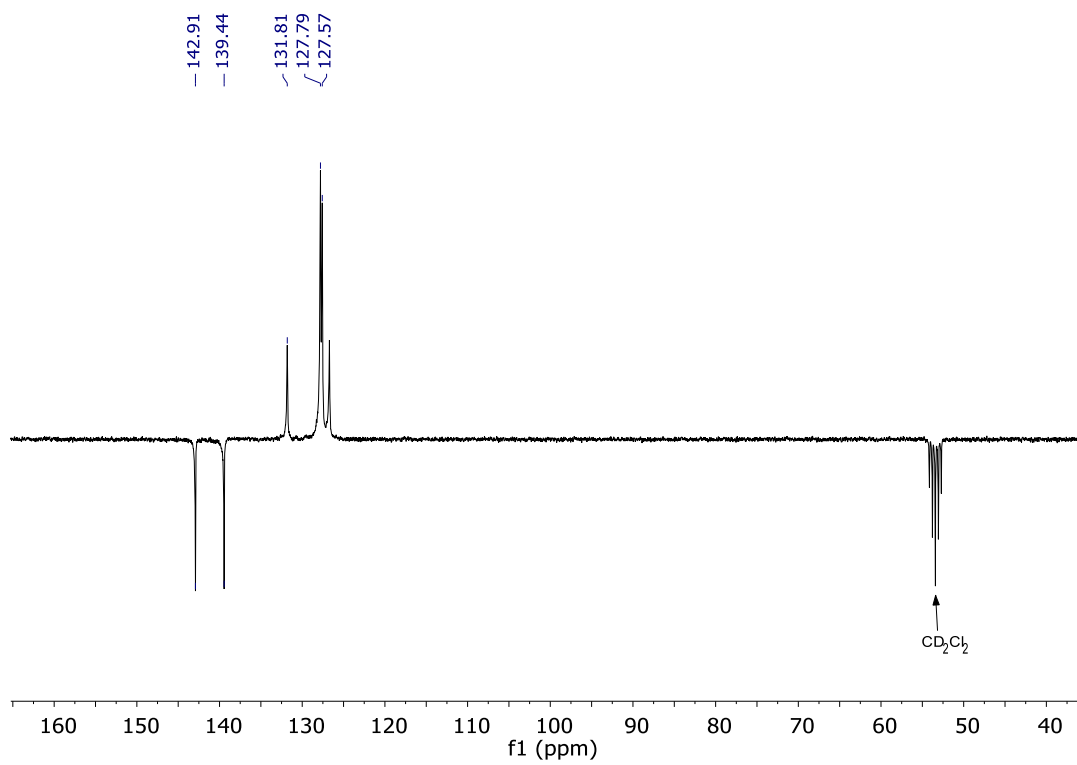

**Figure S36.**  $^{13}C\{^1H\}$  NMR (298 K,  $CD_2Cl_2$ ) of a representative PPA sample.

4.- SEC-MALS and A4F-MALS chromatograms and conformational plots of PPA samples.

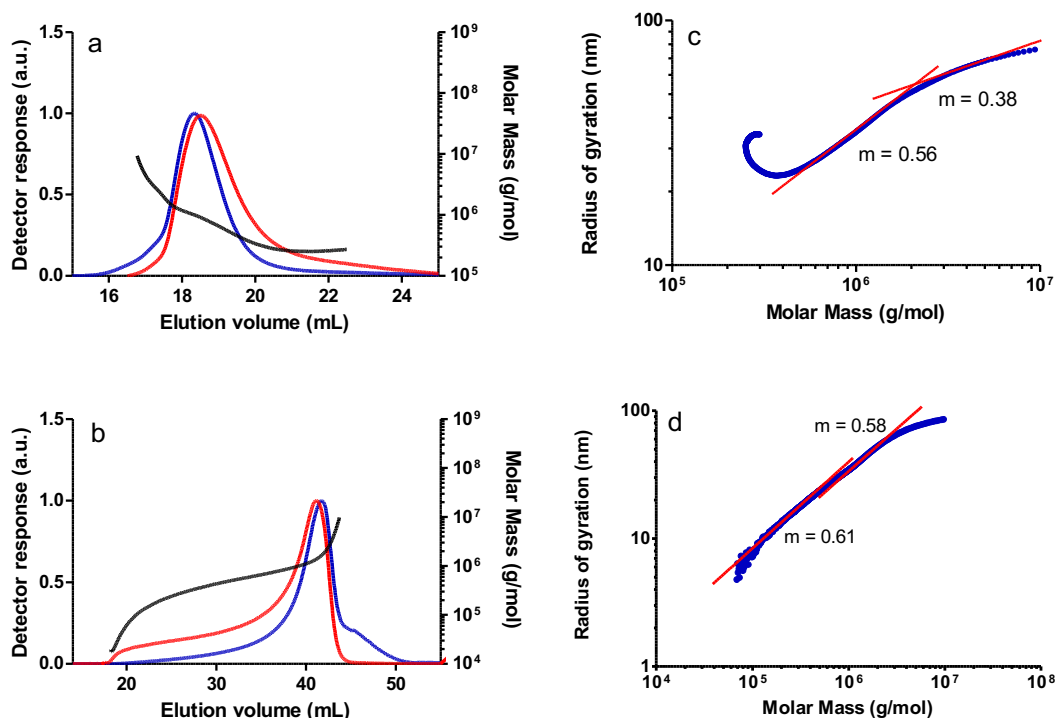

**Figure S37.** SEC chromatograms: light scattering detector response (90 degrees) (blue) and differential refractometer response (red), MM (molar mass) vs. elution volume plot for a PPA sample prepared with catalyst  $[\text{Rh}(\text{C}\equiv\text{C}-\text{Ph})(\text{nbd})\{\text{Ph}_2\text{P}(\text{CH}_2)_3\text{OEt}\}_2]$  (**2**) in THF analyzed by: a) SEC-MALS and b) A4F-MALS. Log-log plot of the radius of gyration ( $r_g$ ) vs MM (blue) and linear fit (red) of the same sample analyzed by: c) SEC-MALS and d) A4F-MALS.

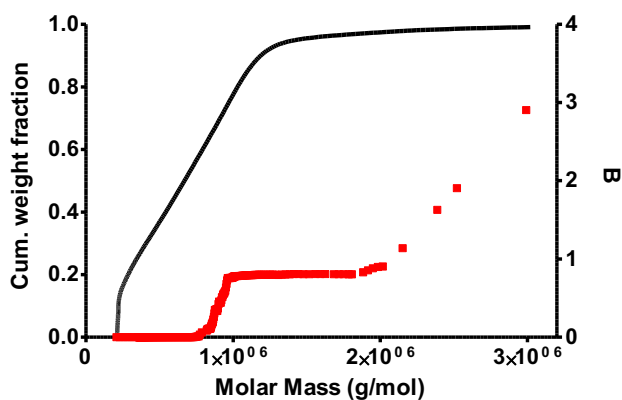

**Figure S38.** Cumulative molar mass distribution (black line) and branch units per macromolecule (B) (red dots) vs. MM determined by A4F-MALS for a PPA sample prepared with catalyst  $[\text{Rh}(\text{C}\equiv\text{C}-\text{Ph})(\text{nbd})\{\text{Ph}_2\text{P}(\text{CH}_2)_3\text{OEt}\}_2]$  (**2**).



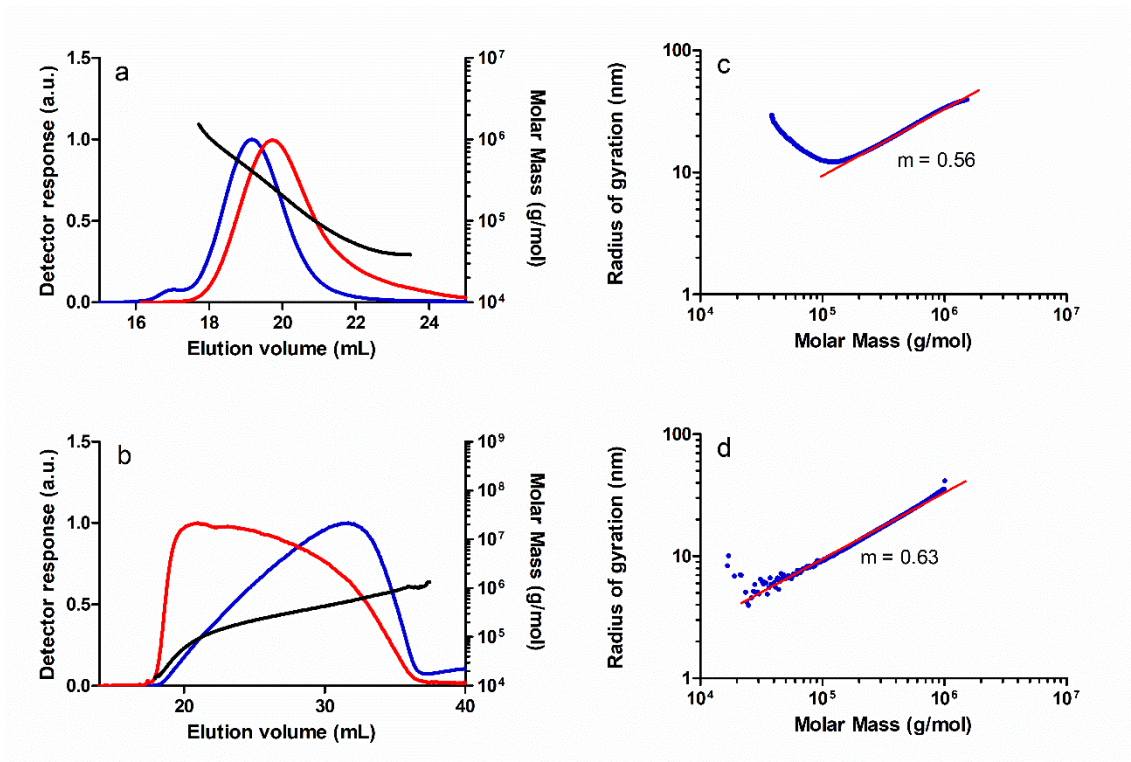

**Figure S39.** SEC chromatograms: light scattering detector response (90 degrees) (blue) and differential refractometer response (red), MM (molar mass) vs. elution volume plot for a PPA sample prepared with catalyst  $[\text{Rh}(\text{C}\equiv\text{C}-\text{Ph})(\text{cod})\{\text{Ph}_2\text{P}(\text{CH}_2)_3\text{NMe}_2\}]$  (3) in THF analyzed by: a) SEC-MALS and b) A4F-MALS. Log-log plot of the radius of gyration ( $r_g$ ) vs MM (blue) and linear fit (red) of the same sample analyzed by: c) SEC-MALS and d) A4F-MALS.

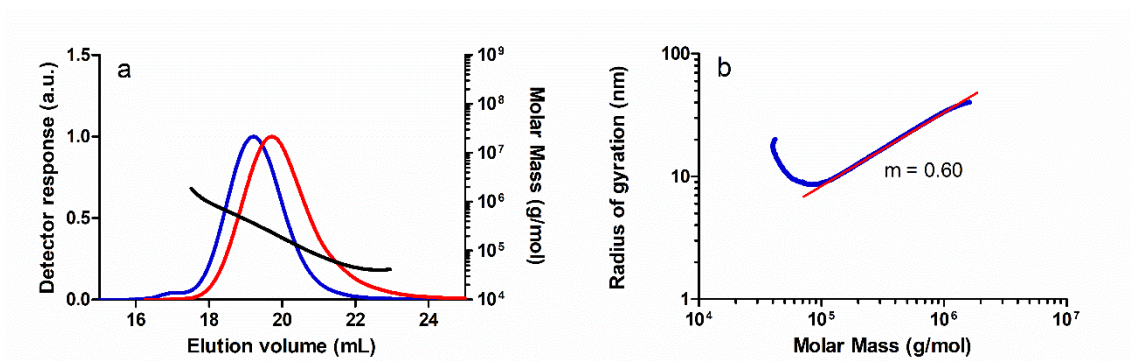

**Figure S40.** a) SEC chromatograms: light scattering detector response (90 degrees) (blue) and differential refractometer response (red), MM (molar mass) vs. elution volume plot for a PPA sample prepared with catalyst  $[\text{Rh}(\text{CH}_3)(\text{cod})\{\text{Ph}_2\text{P}(\text{CH}_2)_3\text{OEt}\}]$  (6) in THF analyzed by SEC-MALS and b) Log-log plot of the radius of gyration ( $r_g$ ) vs MM of the same sample analyzed by SEC-MALS (blue) and linear fit (red).

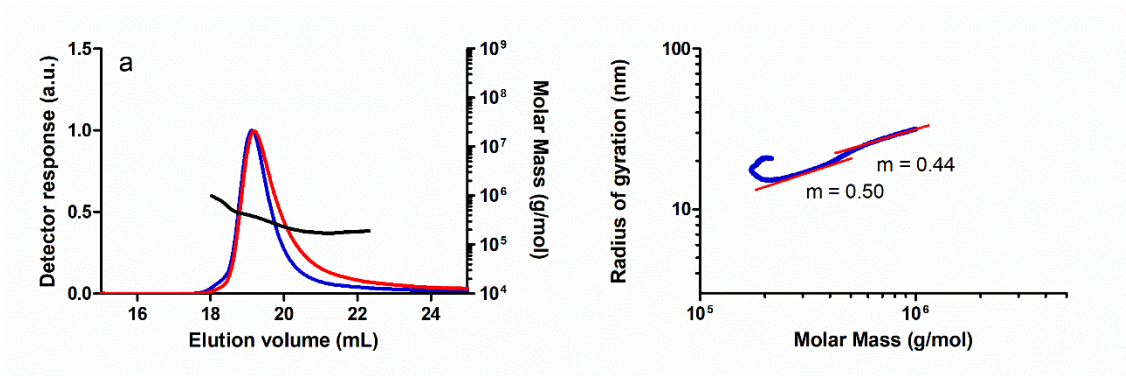

**Figure S41.** a) SEC chromatograms: light scattering detector response (90 degrees) (blue) and differential refractometer response (red), MM (molar mass) vs. elution volume plot for a PPA sample prepared with catalyst  $[\text{Rh}(\text{C}\equiv\text{CC}_6\text{H}_5)(\text{nbd})\{\text{Ph}_2\text{P}(\text{CH}_2)_3\text{NMe}_2\}_2]$  (1)/DMAP in THF analyzed by SEC-MALS and b) Log-log plot of the radius of gyration ( $r_g$ ) vs MM of the same sample analyzed by SEC-MALS (blue) and linear fit (red).

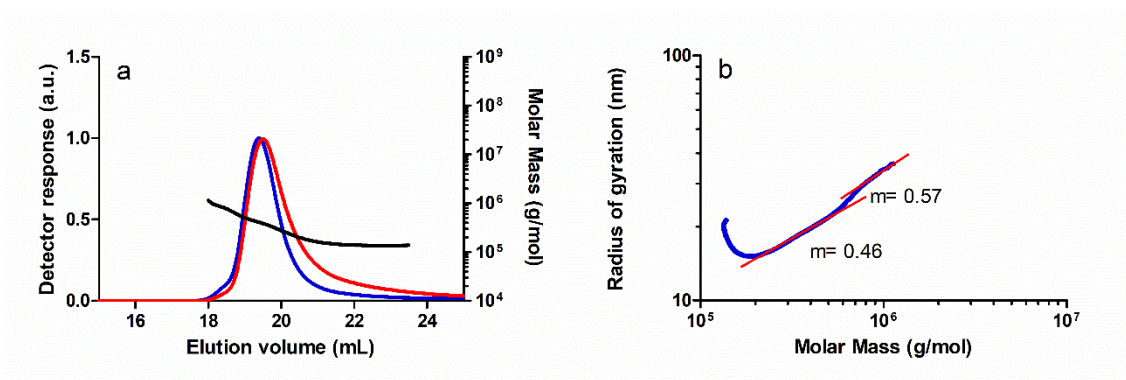

**Figure S42.** a) SEC chromatograms: light scattering detector response (90 degrees) (blue) and differential refractometer response (red), MM (molar mass) vs. elution volume plot for a PPA sample prepared with catalyst  $[\text{Rh}(\text{C}\equiv\text{CC}_6\text{H}_5)(\text{nbd})\{\text{Ph}_2\text{P}(\text{CH}_2)_3\text{OEt}\}_2]$  (2)/DMAP in THF analyzed by SEC-MALS and b) Log-log plot of the radius of gyration ( $r_g$ ) vs MM of the same sample analyzed by SEC-MALS (blue) and linear fit (red).

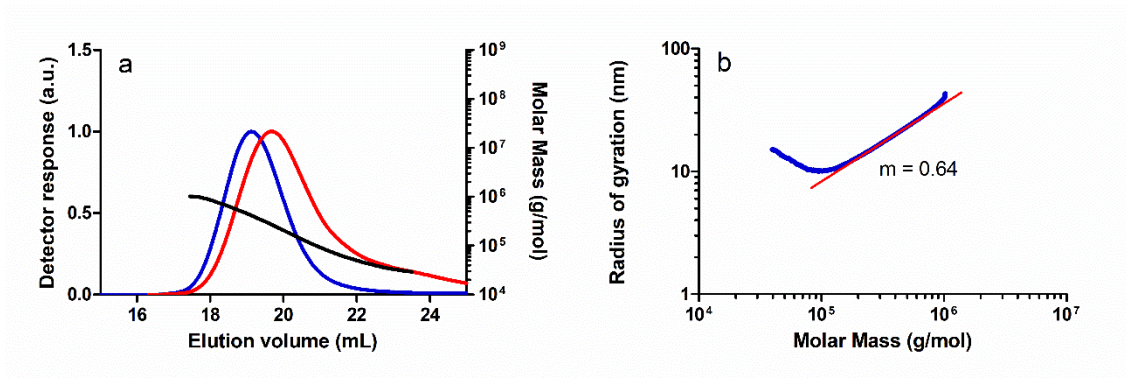

**Figure S43.** a) SEC chromatograms: light scattering detector response (90 degrees) (blue) and differential refractometer response (red), MM (molar mass) vs. elution volume plot for a PPA sample prepared with catalyst  $[\text{Rh}(\text{C}\equiv\text{CC}_6\text{H}_5)(\text{cod})\{\text{Ph}_2\text{P}(\text{CH}_2)_3\text{NMe}_2\}]$  (3)/DMAP in THF analyzed by SEC-MALS and b) Log-log plot of the radius of gyration ( $r_g$ ) vs MM of the same sample analyzed by SEC-MALS (blue) and linear fit (red).

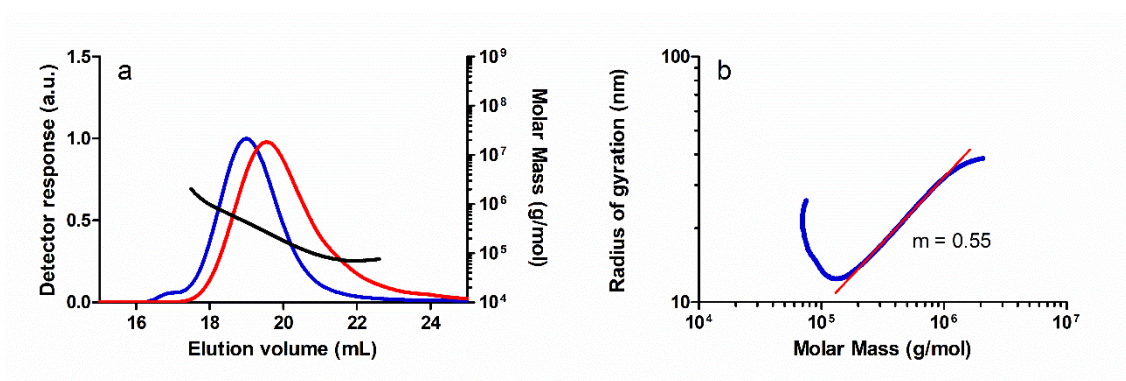

**Figure S44.** a) SEC chromatograms: light scattering detector response (90 degrees) (blue) and differential refractometer response (red), MM (molar mass) vs. elution volume plot for a PPA sample prepared with catalyst  $[\text{Rh}(\text{C}\equiv\text{C-Ph})(\text{cod})\{\text{Ph}_2\text{P}(\text{CH}_2)_3\text{OEt}\}]$  (4)/DMAP in THF analyzed by SEC-MALS and b) Log-log plot of the radius of gyration ( $r_g$ ) vs MM of the same sample analyzed by SEC-MALS (blue) and linear fit (red).



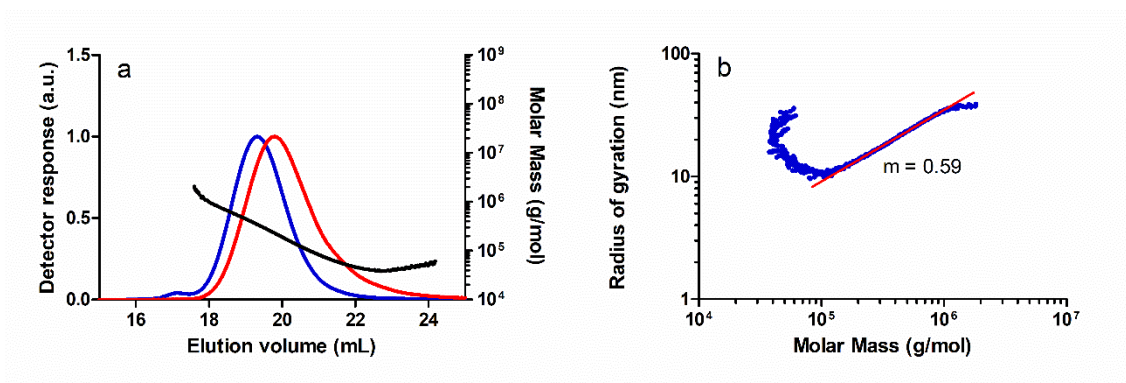

**Figure S45.** a) SEC chromatograms: light scattering detector response (90 degrees) (blue) and differential refractometer response (red), MM (molar mass) vs. elution volume plot for a PPA sample prepared with catalyst  $[\text{Rh}(\text{cod})\{\kappa^2P,N\text{-Ph}_2\text{P}(\text{CH}_2)_3\text{NMe}_2\}]\text{BF}_4$  (**7**) in THF analyzed by SEC-MALS and b) Log-log plot of the radius of gyration ( $r_g$ ) vs MM of the same sample analyzed by SEC-MALS (blue) and linear fit (red).

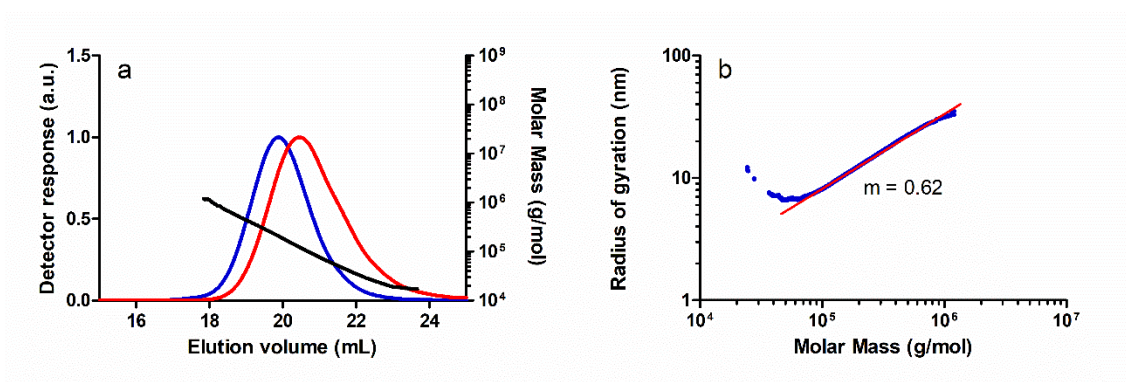

**Figure S46.** a) SEC chromatograms: light scattering detector response (90 degrees) (blue) and differential refractometer response (red), MM (molar mass) vs. elution volume plot for a PPA sample prepared with catalyst  $[\text{Rh}(\text{cod})\{\kappa^2P,O\text{-Ph}_2\text{P}(\text{CH}_2)_3\text{OEt}\}]\text{BF}_4$  (**8**) in THF analyzed by SEC-MALS and b) Log-log plot of the radius of gyration ( $r_g$ ) vs MM of the same sample analyzed by SEC-MALS (blue) and linear fit (red).

## 5.- Possible branching mechanisms.

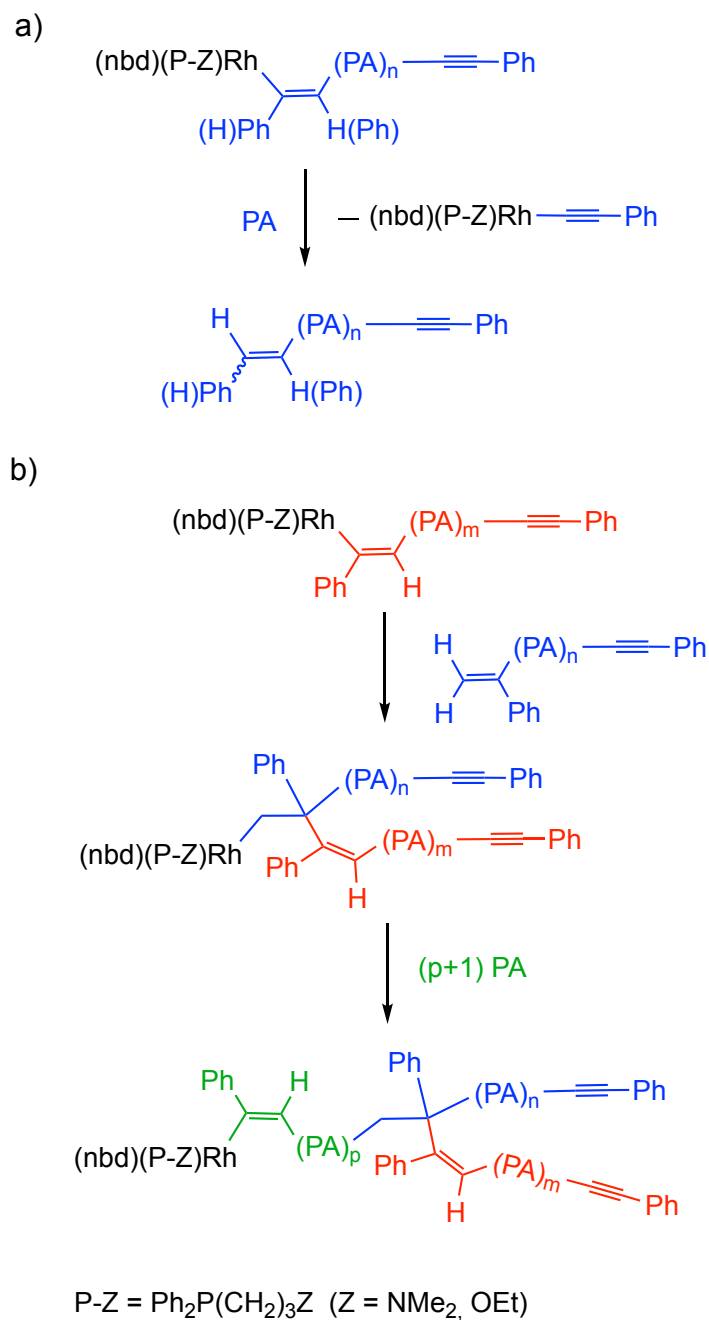

**Figure S47.** Terminal branching: a) Chain transfer to PA leading to the formation of a macromonomer with vinylene or vinylidene end groups. b) Macromonomer copolymerization leading to terminal branching.

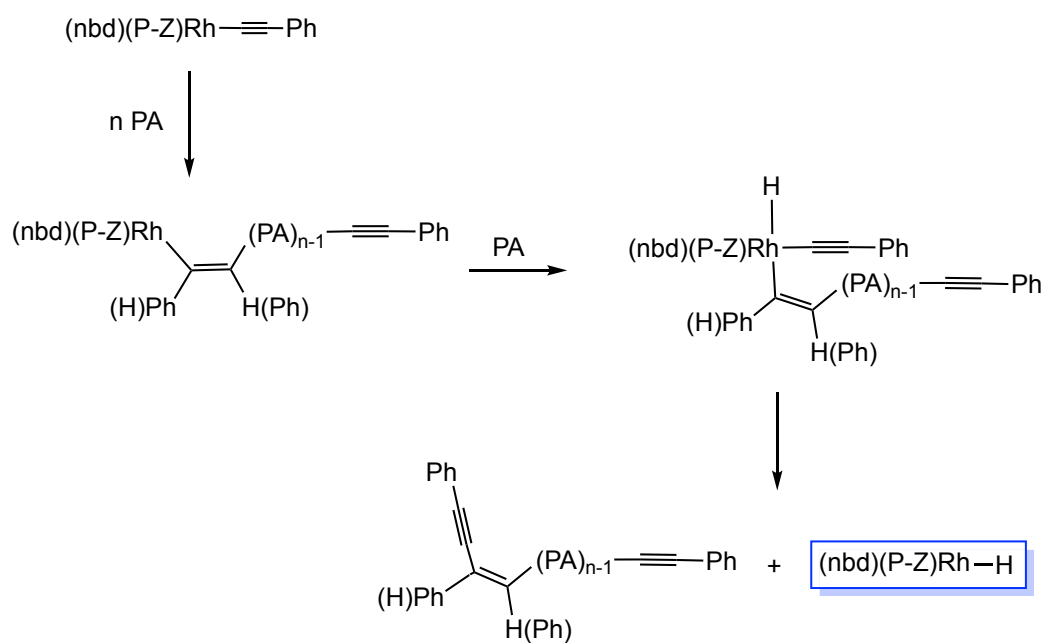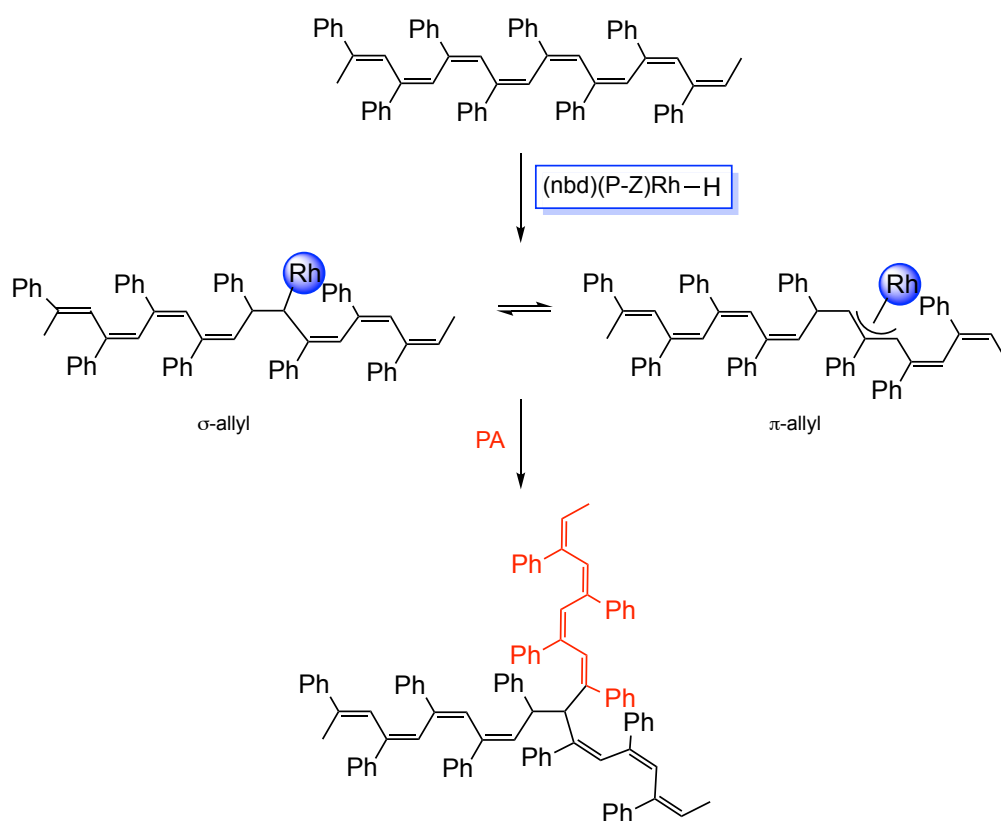

**Figure S48.** Formal chain transfer to polymer mechanism leading to branch formation.

## 6.- References

1.- The % cis content in cis-transoidal PPA samples was determined using the following equation:  $\% \text{ cis} = 100 (A_{5.85} \times 6)/(A_{\text{total}})$  where  $A_{5.85}$  is the area of the vinyl proton and  $A_{\text{total}}$  is the total area of the spectrum. a) A. Furlani, C. Napoletano, M. V. Russo and W. Feast, Stereoregular polyphenylacetylene, *J. Polym. Bull.*, 1986, **16**, 311–317. b) A. Furlani, C. Napoletano, M. V. Russo, A. Camus and N. J. Marsich, The influence of the ligands on the catalytic activity of a series of RhI complexes in reactions with phenylacetylene: Synthesis of stereoregular poly(phenyl) acetylene, *Polym. Sci., Part A: Polym. Chem.*, 1989, **27**, 75–86.

2.- G. R. Fulmer, A. J. M. Miller, N. H. Sherden, H. E. Gottlieb, A. Nudelman, B. M. Stoltz, J. E. Bercaw, K. I. Goldberg, NMR Chemical Shifts of Trace Impurities: Common Laboratory Solvents, Organics, and Gases in Deuterated Solvents Relevant to the Organometallic Chemist, *Organometallics* 2010, **29**, 2176–2179.
